# Supplementary material
Source: PubMed Central journal article supplement (PMC5161088)
Supplement: supp_kww152_kww152MalagonWebMaterialFinal.pdf [file supp_kww152_kww152MalagonWebMaterialFinal.pdf]

# Web Appendix

## Contents

|                                                                                                         |    |
|---------------------------------------------------------------------------------------------------------|----|
| HPV interaction model description .....                                                                 | 2  |
| Model description .....                                                                                 | 2  |
| Demography .....                                                                                        | 2  |
| Natural history of HPV infection .....                                                                  | 2  |
| Sexual partnership formation .....                                                                      | 3  |
| Infection transmission .....                                                                            | 4  |
| Interactions between HPV types .....                                                                    | 5  |
| Model variables and parameters.....                                                                     | 6  |
| Differential equations.....                                                                             | 9  |
| Sums .....                                                                                              | 10 |
| Equations for single individuals .....                                                                  | 10 |
| Equations for individuals in partnerships .....                                                         | 11 |
| Equations for the rates of infection and partnering .....                                               | 30 |
| Calculation of epidemiologic measures of association between HPV types (interaction estimates)<br>..... | 30 |
| Cross-sectional measures of association .....                                                           | 31 |
| Prevalence Odds Ratio (OR).....                                                                         | 31 |
| Prospective measures of association.....                                                                | 31 |
| Incidence rate ratio (IRR) by infection status.....                                                     | 31 |
| IRR of infection by immune status.....                                                                  | 34 |
| References.....                                                                                         | 37 |

# HPV interaction model description

## Model description

We built a deterministic compartmental dynamic model programmed in R using the deSolve package (1).

### Demography

The model represents a sexually active population of heterosexual individuals. Individuals are stratified according to sex  $g$  {W = women, M = men} and sexual activity level  $s$  {L = low, H = high}. Age is not modeled. A proportion  $\vartheta_{gs}$  of sex  $g$  enters the population with sexual activity level  $s$ . The rate of entry equals the rate of exit from the sexually active population ( $\mu$ ). The exit rate is assumed not to depend on an individual's health state, sex, or sexual activity. Individuals keep the same sexual activity level throughout their lives.

### Natural history of HPV infection

We model the natural history of 2 types of human papillomavirus (HPV) using a *SIRS* natural history structure for both. The HPV type is designated with the subscript  $i$  {1 = type 1, 2 = type 2, 12 = types 1 and 2}. Individuals can be susceptible ( $S_i$ ), infected ( $I_i$ ), or recovered/immune ( $R_i$ ) to infection with either type. Individuals may be in 9 mutually exclusive health state compartments ( $[S_1S_2]$ ,  $[S_1I_2]$ ,  $[S_1R_2]$ ,  $[I_1S_2]$ ,  $[I_1I_2]$ ,  $[I_1R_2]$ ,  $[R_1S_2]$ ,  $[R_1I_2]$ ,  $[R_1R_2]$ ) representing the possible combinations of  $S_i$ ,  $I_i$ ,  $R_i$  states for the two HPV types.

Natural history transitions for the health states with a particular HPV type  $i$  are presented in Web Figure 1, while all possible transitions between the 9 potential health states with both HPV types are presented in Web Figure 2. Individuals enter the sexually active population susceptible to HPV types 1 and 2 (health state  $[S_1S_2]$ ). The rate of infection of susceptible individuals  $\lambda_{ig}$  is detailed in the section Infection transmission on page 5. Infected health states are  $[I_1S_2]$ ,  $[I_1I_2]$ ,  $[I_1R_2]$  for type 1 and  $[S_1I_2]$ ,  $[I_1I_2]$ ,  $[R_1I_2]$  for type 2. Infected individuals clear infections at a type- and sex-specific rate  $\gamma_{ig}$ . Following infection clearance, each sex has a probability  $\sigma_{ig}$  of developing natural type-specific immunity while the rest ( $1-\sigma_{ig}$ ) return to the susceptible health states. Individuals in immune health states have complete type-specific natural immunity. Natural immunity wanes at a type- and sex-specific rate  $\omega_{ig}$ . Individuals whose type-specific immunity has waned become susceptible to infection again. Individuals who become susceptible again after clearing infection or losing their natural immunity have the same infection rate as individuals who have never been infected. The model can thus easily represent different natural histories such as SIS ( $\sigma_{ig} = 0$ ), SIR ( $\omega_{ig} = 0$ ), or SI ( $\gamma_{ig} = 0$ ).

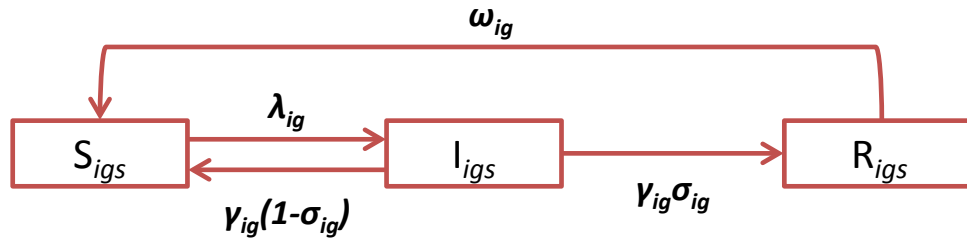

**Web Figure 1.** Transition rates between health states for a single HPV type  $i$ . Individuals can be susceptible ( $S_i$ ), infected ( $I_i$ ), or recovered/immune ( $R_i$ ) to infection.  $\lambda_{ig}$  = rate of infection.  $\gamma_{ig}$  = rate of infection clearance.  $\sigma_{ig}$  = probability of developing type-specific natural immunity.  $\omega_{ig}$  = rate of waning of natural immunity.

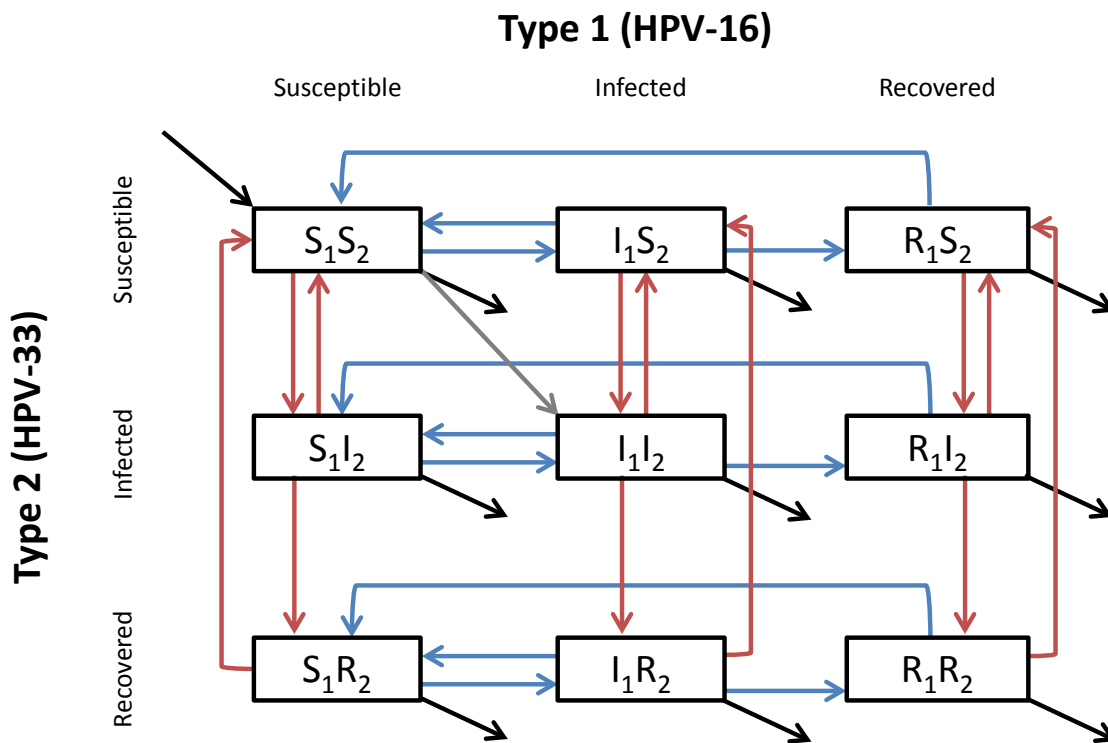

**Web Figure 2.** Flow diagram of health states. Boxes represent mutually exclusive health states. Arrows represent possible transitions between health states, with black arrows representing population entries and exits, blue arrows representing changes in health status with HPV type 1, red arrows representing changes in health status with HPV type 2, and the grey arrows representing change in the health status of both HPV types 1 and 2. Individuals can be susceptible ( $S_i$ ), infected ( $I_i$ ), or recovered/immune ( $R_i$ ) to infection with HPV type  $i$ .

### Sexual partnership formation

Sexual partnership duration and dissolution are explicitly modeled. Individuals are stratified by whether they are single or in partnership, and by the sexual activity level and health state of their partner. This allows the model to keep track of the health state of both individuals in the

partnership. In equations, the partners' characteristics are indicated with an apostrophe ('). Individuals enter the population as singles. Individuals will spend an average proportion of their sexually active lives in sexual partnerships ( $\zeta$ ) and the rest as singles ( $1-\zeta$ ).

Individuals have a sex- and sexual activity level-specific rate of new partner acquisition  $c_{gs}$ . The sexual partnership formation rate of singles ( $v_{gs}$ ) and the sexual partnership dissolution rates ( $\tau_{gs}$ ) are a function of the overall desired new partner acquisition rate ( $c_{gs}$ ) and the proportion of time spent in sexual partnerships ( $\zeta$ ). In other words, the more time individuals spend in sexual partnerships, the higher the partnership formation rate must be once they are single to acquire the same number of new partners over time. Individuals in sexual partnerships have sex acts at a rate  $\pi$ . The two partners' dissolution rates ( $\tau_{gs}$  and  $\tau_{g's'}$ ) are averaged to determine the dissolution rate of their partnership. Sexual partnerships also end if one of the partners exits the population. Individuals from dissolved sexual partnerships return to the single strata.

The probability that an individual of sex  $g$  and sexual activity level  $s$  forms a sexual partnership with a member of the opposite sex  $g'$  of sexual activity level  $s'$  is  $\rho_{gs'g's'}$ . This probability depends on the number of sexual partnerships available from singles in each sexual activity level and the assortativity parameter  $\epsilon$ . The assortativity parameter  $\epsilon$  is the proportion of sexual partnerships that are made exclusively with individuals of the same sexual activity level. The remaining sexual partnerships ( $1-\epsilon$ ) are made proportionately to the number of sexual partnerships available from each sexual activity level. Mixing does not depend on individuals' health states. We balanced the number of sexual partnerships between sexes and sexual activity levels using the method described by Garnett and Anderson (2). Men and women adjust their partner acquisition rates using a compromise parameter  $\xi$ , which determines whether women's ( $\xi = 1$ ) or men's ( $\xi = 0$ ) desires determine sexual partnership formation.

### **Infection transmission**

Individuals susceptible to type  $i$  can only be infected when they are in a sexual partnership with a partner infected with type  $i$ . The rate of infection with type  $i$  during a partnership with an infected partner ( $\lambda_{ig}$ ) depends on the rate of sexual acts in partnerships ( $\pi$ ) and the type- and sex-specific probability of infection per-sex-act with an infected partner ( $\delta_{ig}$ ). Transmissions occur during sex acts within a partnership.

The model takes into account the probability of acquiring more than one HPV type from the same partner and from the same sex act if the individual is susceptible to both types [ $S_1S_2$ ] and partnered with a coinfecting partner [ $I_1I_2$ ]. The overall rate of infection  $\lambda_{ig}$  in these individuals represents the sum of all type  $i$  transmissions, whether these occur as single-type transmission and or are cotransmitted simultaneously in the same sex act with the other HPV type. This overall rate of infection  $\lambda_{ig}$  is thus the sum of the rate of simultaneous cotransmissions with both HPVs ( $\lambda_{12g}$ ) and the rate of single-type transmissions with  $i$  ( $\lambda_{ig}-\lambda_{12g}$ ). The rate of cotransmission  $\lambda_{12g}$  depends on the rate of sexual acts in partnerships ( $\pi$ ) and the joint probability of acquiring both infections during a sex act ( $\delta_{1g} * \delta_{2g}$ ). The rate of single-type transmission ( $\lambda_{ig}-\lambda_{12g}$ ) depends

on the rate of sexual acts in partnerships ( $\pi$ ) and the probability of acquiring only type  $i$  from a sex act with a coinfecting partner ( $\delta_{1g}(1-\delta_{2g})$  for type 1 and  $(1-\delta_{1g})\delta_{2g}$  for type 2).

Individuals infected with different types in a sexual partnership ( $[S_1I_2]$  partnered with  $[I_1S_2]$ ) may also simultaneously transmit both respective infections to each other upon a same sex act. This rate ( $\lambda_{ig'g'}$ ) depends on the joint probability of each discordant partner acquiring the other's HPV type in a sex act ( $\delta_{ig} * \delta_{i'g'}$ ).

### Interactions between HPV types

The HPV types may interact by modifying the probability of transmission of the other HPV type from an infected to a susceptible partner. Individuals infected with a first HPV but susceptible to the other HPV type  $i$  ( $[S_1I_2]$  and  $[I_1S_2]$  states) have their rate of infection with HPV  $i$  multiplied by the type-specific factor  $\chi_{ig}$ . This parameter represents any biological effect assumed to be caused by a current infection with a first HPV type which increases or reduces the probability a new HPV type can establish an infection after sexual contact with an infected partner (e.g. competition for host resources, creation of lesions vulnerable to other infections). Individuals immune to a first HPV but susceptible to the other HPV type  $i$  ( $[S_1R_2]$  and  $[R_1S_2]$  states) have their rate of infection with HPV  $i$  multiplied by a type-specific factor  $\varphi_{ig}$ . This parameter represents any biological effect assumed to be caused by the long-term immune response developed against one HPV type which increases or reduces the probability a new HPV type can establish an infection after sexual contact with an infected partner (e.g. cross-immunity).

Biological interactions are assumed to affect the probability of infection per-sex-act with an infected partner ( $\delta_{ig}$ ), the biological component of the infection rate. Because this probability must be between 0-100%, the interaction factors  $\chi_{ig}$  and  $\varphi_{ig}$  have a lower bound of 0 and an upper bound of the inverse of the infection probability ( $\delta_{ig}^{-1}$ ). Values beyond this range do not make biological sense. If  $\chi_{ig}$  and  $\varphi_{ig} = 1$ , then the health state with one HPV type does not affect the rate of infection with the other HPV type and there are no interactions. If  $\chi_{ig}$  or  $\varphi_{ig} < 1$ , infection or immunity with a first HPV type reduces the probability of infection with the other HPV type which corresponds to competitive interactions. If  $\chi_{ig}$  or  $\varphi_{ig} > 1$ , infection or immunity with a first HPV type increases the probability of infection with the other HPV type, which corresponds to facilitative interactions.

Note that our model assumes biological interactions operate on a multiplicative scale, though the epidemiologic literature generally considers biological interactions to operate on an additive scale (3). We chose to model interactions this way because we are modeling an ecological definition of interactions (which are beneficial and detrimental causal effects of organisms on each other's natural history) rather than an epidemiologic definition of interactions (exposures which participate in the same causal mechanism under a sufficient-cause model(3)). Epidemiological studies generally use relative ratios to measure associations between HPV types. This suggests that epidemiologists conceive infections with previous HPV types as potentially having a relative causal effect upon the probability of acquiring new HPV types.

# Model variables and parameters

**Web Table 1.** Description of subscripts, variables, and parameters

| Symbol                                      | Description                                                                                            | Stratifications                                                                        | Value(s) in Base Case Scenario | Reference |
|---------------------------------------------|--------------------------------------------------------------------------------------------------------|----------------------------------------------------------------------------------------|--------------------------------|-----------|
| <b>Subscripts</b>                           |                                                                                                        |                                                                                        |                                |           |
| $g, g'$                                     | Gender, partner's sex                                                                                  | M=men, W=women                                                                         | -                              | -         |
| $s, s'$                                     | Sexual activity level, partner's sexual activity level                                                 | L=low, H=high                                                                          | -                              | -         |
| $i$                                         | HPV type                                                                                               | 1=type 1, 2=type 2, 12=types1and2                                                      | -                              | -         |
| <b>Health and sexual partnership states</b> |                                                                                                        |                                                                                        |                                |           |
| $[S_1S_2]_{gs}^0$                           | Susceptible to both types, single                                                                      | Gender, sexual activity level                                                          | Variable                       | -         |
| $[S_1I_2]_{gs}^0$                           | Susceptible to type 1, infected with type 2, single                                                    | Gender, sexual activity level                                                          | Variable                       | -         |
| $[S_1R_2]_{gs}^0$                           | Susceptible to type 1, immune to type 2, single                                                        | Gender, sexual activity level                                                          | Variable                       | -         |
| $[I_1S_2]_{gs}^0$                           | Infected with type 1, susceptible to type 2, single                                                    | Gender, sexual activity level                                                          | Variable                       | -         |
| $[I_1I_2]_{gs}^0$                           | Infected with both types, single                                                                       | Gender, sexual activity level                                                          | Variable                       | -         |
| $[I_1R_2]_{gs}^0$                           | Infected with type 1, immune to type 2, single                                                         | Gender, sexual activity level                                                          | Variable                       | -         |
| $[R_1S_2]_{gs}^0$                           | Immune to type 1, susceptible to type 2, single                                                        | Gender, sexual activity level                                                          | Variable                       | -         |
| $[R_1I_2]_{gs}^0$                           | Immune to type 1, infected with type 2, single                                                         | Gender, sexual activity level                                                          | Variable                       | -         |
| $[R_1R_2]_{gs}^0$                           | Immune to both types, single                                                                           | Gender, sexual activity level                                                          | Variable                       | -         |
| $[S_1S_2]_{gs}^{[Y_1Y_2]g'st}$              | Susceptible to both types, in partnership with individual in health state $[Y_1Y_2]$                   | Gender, sexual activity level, partner's sexual activity level, partner's health state | Variable                       | -         |
| $[S_1I_2]_{gs}^{[Y_1Y_2]g'st}$              | Susceptible to type 1, infected with type 2, in partnership with individual in health state $[Y_1Y_2]$ | Gender, sexual activity level, partner's sexual activity level, partner's health state | Variable                       | -         |
| $[S_1R_2]_{gs}^{[Y_1Y_2]g'st}$              | Susceptible to type 1, immune to type 2, in partnership with individual in health state $[Y_1Y_2]$     | Gender, sexual activity level, partner's sexual activity level, partner's health state | Variable                       | -         |

|                                     |                                                                                                         |                                                                                                 |          |   |
|-------------------------------------|---------------------------------------------------------------------------------------------------------|-------------------------------------------------------------------------------------------------|----------|---|
| $[I_1 S_2]_{gs}^{[Y_1 Y_2]_{g'st}}$ | Infected with type 1, susceptible to type 2, in partnership with individual in health state $[Y_1 Y_2]$ | state<br>Gender, sexual activity level, partner's sexual activity level, partner's health state | Variable | - |
| $[I_1 I_2]_{gs}^{[Y_1 Y_2]_{g'st}}$ | Infected with both types, in partnership with individual in health state $[Y_1 Y_2]$                    | Gender, sexual activity level, partner's sexual activity level, partner's health state          | Variable | - |
| $[I_1 R_2]_{gs}^{[Y_1 Y_2]_{g'st}}$ | Infected with type 1, immune to type 2, in partnership with individual in health state $[Y_1 Y_2]$      | Gender, sexual activity level, partner's sexual activity level, partner's health state          | Variable | - |
| $[R_1 S_2]_{gs}^{[Y_1 Y_2]_{g'st}}$ | Immune to type 1, susceptible to type 2, in partnership with individual in health state $[Y_1 Y_2]$     | Gender, sexual activity level, partner's sexual activity level, partner's health state          | Variable | - |
| $[R_1 I_2]_{gs}^{[Y_1 Y_2]_{g'st}}$ | Immune to type 1, infected with type 2, in partnership with individual in health state $[Y_1 Y_2]$      | Gender, sexual activity level, partner's sexual activity level, partner's health state          | Variable | - |
| $[R_1 R_2]_{gs}^{[Y_1 Y_2]_{g'st}}$ | Immune to both types, in partnership with individual in health state $[Y_1 Y_2]$                        | Gender, sexual activity level, partner's sexual activity level, partner's health state          | Variable | - |

---

### Demography

---

|                  |                                                                                |                               |                            |                  |
|------------------|--------------------------------------------------------------------------------|-------------------------------|----------------------------|------------------|
| $N_g$            | Population size of sex $g$                                                     | Gender                        | 10 000                     | -                |
| $\mu$            | Exit/entry rate                                                                | None                          | 1/40.00 years              | Assumed          |
| $\vartheta_{gs}$ | Proportion of individuals entering the population in sexual activity level $s$ | Gender, sexual activity level | $s=L: 0.93$<br>$s=H: 0.07$ | (4) <sup>a</sup> |

---

### Natural history of infection

---

|               |                                                      |           |               |                  |
|---------------|------------------------------------------------------|-----------|---------------|------------------|
| $\gamma_{ig}$ | Infection clearance rate                             | Type, sex | 1/1.40 years  | (5) <sup>b</sup> |
| $\sigma_{ig}$ | Proportion of infections conferring natural immunity | Type, sex | 0.60          | (6)              |
| $\omega_{ig}$ | Waning rate of natural immunity                      | Type, sex | 1/10.00 years | (7) <sup>c</sup> |
| $\chi_{ig}$   | Relative probability of infection                    | Type, sex | 1.00          | Assumed          |

|                                                   |                                                                                                                                                       |                                                                               |                                                      |                    |
|---------------------------------------------------|-------------------------------------------------------------------------------------------------------------------------------------------------------|-------------------------------------------------------------------------------|------------------------------------------------------|--------------------|
|                                                   | with type $i$ of individuals infected with other HPV type (interaction effect)                                                                        |                                                                               |                                                      |                    |
| $\varphi_{ig}$                                    | Relative probability of infection with type $i$ of individuals immune to other HPV type (interaction effect)                                          | Type, sex                                                                     | 1.00                                                 | Assumed            |
| <b>Sexual behavior and infection transmission</b> |                                                                                                                                                       |                                                                               |                                                      |                    |
| $c_{gs}$                                          | New partner acquisition rate                                                                                                                          | Gender, sexual activity level                                                 | $s=L: 0.80/\text{year}$ ,<br>$s=H: 5.00/\text{year}$ | (4) <sup>d</sup>   |
| $\varepsilon$                                     | Proportion of sexual partnerships made exclusively with same sexual activity level                                                                    | None                                                                          | 0.00                                                 | Assumed            |
| $\rho_{gsg's'}$                                   | Proportion of sexual partnerships formed with partners of opposite sex $g'$ and sexual activity level $s'$ . Depends on $c_{gs}$ and $\varepsilon$ .  | Gender, sexual activity level, partner's sex, partner's sexual activity level | Variable                                             | -                  |
| $\xi$                                             | Compromise between women and men's desires for sexual partnerships (1=women choose, 0=men choose, 0-1= compromise)                                    | None                                                                          | 1.00                                                 | Assumed            |
| $\zeta$                                           | Proportion of time spent in sexual partnerships                                                                                                       | None                                                                          | 0.75                                                 | (8) <sup>e</sup>   |
| $\tau_{gs}$                                       | Sexual partnership dissolution rate. Depends on $c_{gs}$ and $\zeta$ .                                                                                | Gender, sexual activity level                                                 | Variable                                             | -                  |
| $v_{gs}$                                          | Sexual partnership formation rate for singles. Depends on $c_{gs}$ and $\zeta$ .                                                                      | Gender, sexual activity level                                                 | Variable                                             | -                  |
| $v_{gsg's'}$                                      | Effective partner formation rates with partners of opposite sex $g'$ sexual activity level $s'$ . Depends on $v_{gs}$ , $\rho_{gsg's'}$ , and $\xi$ . | Gender, sexual activity level, partner's sex, partner's sexual activity level | Variable                                             | -                  |
| $\delta_{ig}$                                     | Probability of acquiring infection with type $i$ per-sex-act with an $i$ infected partner                                                             | Type, sex                                                                     | 0.13                                                 | (9) <sup>b,f</sup> |
| $\pi$                                             | Rate of sex acts in sexual partnerships                                                                                                               | None                                                                          | 75.40/year                                           | (10) <sup>g</sup>  |
| $\lambda_{ig}$                                    | Infection rate with type $i$ of individuals susceptible to $i$ who have a partner infected with $i$ . Depends on $\delta_{ig}$ and $\pi$              | Type, sex                                                                     | Variable                                             | -                  |
| $\lambda_{12g}$                                   | Rate of simultaneous cotransmission of both HPV types from coinfecting partners to individuals susceptible to both                                    | Gender                                                                        | Variable                                             | -                  |



|                                   |                                                                                                                                                                                                                                                                                                           |        |          |   |
|-----------------------------------|-----------------------------------------------------------------------------------------------------------------------------------------------------------------------------------------------------------------------------------------------------------------------------------------------------------|--------|----------|---|
|                                   | HPV types. Depends on $\delta_{1g}$ , $\delta_{2g}$ , and $\pi$ .                                                                                                                                                                                                                                         |        |          |   |
| $\lambda_{1g2g}, \lambda_{1g'2g}$ | Rates of simultaneously transmitting one's HPV type and acquiring one's partner's HPV type for partners susceptible and infected with discordant HPV types (health states $[S_1 I_2]_{gs}^{[I_1 S_2]g's'}$ and $[I_1 S_2]_{gs}^{[S_1 I_2]g's'}$ ). Depends on $\delta_{1g}$ , $\delta_{2g}$ , and $\pi$ . | Gender | Variable | - |

$[Y_1 Y_2]$  = partner's health state, where  $Y_i$  can be  $S_i$ ,  $I_i$ , or  $R_i$ . HPV = human papillomavirus.

<sup>a</sup> Based on the cumulative proportion of women who had  $\leq 2$  and  $>2$  partners in the past year during 2006-2010.

<sup>b</sup> Averaged over all HPV types in order to obtain parameter for a generic HPV type.

<sup>c</sup> We assumed antibody seropositivity correlates with immunity, and that seropositivity wanes at a constant rate. We calculated the average duration of immunity which leads to 55% of women initially seropositive at baseline remaining seropositive after 6.4 years:

$$\frac{1}{\omega_{ig}} = \frac{6.4 \text{ years}}{\ln(1/0.55)} = 10.7 \text{ years}$$

<sup>d</sup> In the lower risk group, calculated as the cumulative distribution of women who have never had sex, those with no partners, 1, and 2 partners in the past year:

$$\frac{0.110(0) + 0.061(0) + 0.690(1) + 0.076(2)}{0.110 + 0.061 + 0.690 + 0.076} = 0.8$$

<sup>e</sup> Based on the proportion of women reporting being in a stable partnership.

<sup>f</sup> The probability per-sex-act with an infected partner is set so that the probability of acquisition over the course of an average sexual partnership in the high risk group (which has the shorter partnership duration) is equal to 0.79:

$$v = 1 - e^{\left(\frac{\ln(1-\beta_{ig})}{\tau_s^{-1} * \pi}\right)} = 1 - e^{\left(\frac{\ln(1-0.79)}{(5/0.75)^{-1} * 75.4}\right)} = 0.1289$$

<sup>g</sup> Based on frequency of sexual intercourse in the past 4 weeks in women 16-24 who had at least one male partner in the past year:

$$\frac{5.8 \text{ sex acts}}{4 \text{ partnership-weeks}} * \frac{52 \text{ weeks}}{\text{year}} = \frac{75.4 \text{ sex acts}}{\text{partnership-year}}$$

## Differential equations

The model has 684 mutually exclusive compartments (2 sexes \* 2 sexual activity levels \* 9 health states \* [1 single state + 1 partnered state \* {2 partner sexual activity levels \* 9 partner health states}]). Single individuals are indicated with the superscript 0 in  $[X_1 X_2]_{gs}^0$  (where  $[X_1 X_2]$  can be one of any of the 9 health states), while partnered individuals are indicated with the health state of their partner in superscript  $[X_1 X_2]_{gs}^{[Y_1 Y_2]g's'}$  (where  $[Y_1 Y_2]$  may also be one of any of the 9 health states). Compartments represent individuals, not partnerships, so there are equal numbers of women partnered with men as there are men partnered with women in any given health states ( $[X_1 X_2]_{g=W,s}^{[Y_1 Y_2]g'=M,s'} = [Y_1 Y_2]_{g'=M,s'}^{[X_1 X_2]g=W,s}$ ). Individuals change compartments if their

own health state changes, their partner's health state changes, if a partnership is created, or if a partnership dissolves.

## Sums

The following represent sums of all single individuals ( $N_g^0$ ), all partnered individuals ( $N_g^{Ng'}$ ), all individuals of sexual activity level  $s$  with a partner of a given health state and sexual activity level  $s'$  ( $N_{gs}^{[Y_1 Y_2] g' s'}$ ), and all individuals with a given health state and sexual activity level  $s$  who have a partner of sexual activity level  $s'$  ( $[X_1 X_2]_{gs}^{Ng' s'}$ ):

$$\begin{aligned}
 N_g^0 &= \sum_s \left( [S_1 S_2]_{gs}^0 + [S_1 I_2]_{gs}^0 + [S_1 R_2]_{gs}^0 + [I_1 S_2]_{gs}^0 + [I_1 I_2]_{gs}^0 + [I_1 R_2]_{gs}^0 + [R_1 S_2]_{gs}^0 + [R_1 I_2]_{gs}^0 + [R_1 R_2]_{gs}^0 \right) \\
 N_g^{Ng'} &= \sum_s \left( [S_1 S_2]_{gs}^{Ng'} + [S_1 I_2]_{gs}^{Ng'} + [S_1 R_2]_{gs}^{Ng'} + [I_1 S_2]_{gs}^{Ng'} + [I_1 I_2]_{gs}^{Ng'} + [I_1 R_2]_{gs}^{Ng'} + [R_1 S_2]_{gs}^{Ng'} + [R_1 I_2]_{gs}^{Ng'} + [R_1 R_2]_{gs}^{Ng'} \right) \\
 N_{gs}^{[Y_1 Y_2] g' s'} &= \left( [S_1 S_2]_{gs}^{[Y_1 Y_2] g' s'} + [S_1 I_2]_{gs}^{[Y_1 Y_2] g' s'} + [S_1 R_2]_{gs}^{[Y_1 Y_2] g' s'} + [I_1 S_2]_{gs}^{[Y_1 Y_2] g' s'} + [I_1 I_2]_{gs}^{[Y_1 Y_2] g' s'} + [I_1 R_2]_{gs}^{[Y_1 Y_2] g' s'} \right. \\
 &\quad \left. + [R_1 S_2]_{gs}^{[Y_1 Y_2] g' s'} + [R_1 I_2]_{gs}^{[Y_1 Y_2] g' s'} + [R_1 R_2]_{gs}^{[Y_1 Y_2] g' s'} \right) \\
 [X_1 X_2]_{gs}^{Ng' s'} &= \left( [X_1 X_2]_{gs}^{[S_1 S_2] g' s'} + [X_1 X_2]_{gs}^{[S_1 I_2] g' s'} + [X_1 X_2]_{gs}^{[S_1 R_2] g' s'} + [X_1 X_2]_{gs}^{[I_1 S_2] g' s'} + [X_1 X_2]_{gs}^{[I_1 I_2] g' s'} + [X_1 X_2]_{gs}^{[I_1 R_2] g' s'} \right. \\
 &\quad \left. + [X_1 X_2]_{gs}^{[R_1 S_2] g' s'} + [X_1 X_2]_{gs}^{[R_1 I_2] g' s'} + [X_1 X_2]_{gs}^{[R_1 R_2] g' s'} \right)
 \end{aligned}$$

## Equations for single individuals

The following are differential equations for singles:

$$\begin{aligned}
\frac{d[S_1S_2]_{gs}^0}{dt} &= (-\mu - \nu_{gs})[S_1S_2]_{gs}^0 + \sum_{s'} \left( \left( \frac{\tau_{gs} + \tau_{g's'}}{2} \right) [S_1S_2]_{gs}^{N_{g's'}} + \mu N_{g's'}^{[S_1S_2]_{gs}} \right) + \gamma_{1g} (1 - \sigma_{1g}) [I_1S_2]_{gs}^0 + \gamma_{2g} (1 - \sigma_{2g}) [S_1I_2]_{gs}^0 \\
&\quad + \omega_{1g} [R_1S_2]_{gs}^0 + \omega_{2g} [S_1R_2]_{gs}^0 + \mu \theta_{gs} (N_g^0 + N_{g'}^{N_{g'}}) \\
\frac{d[S_1I_2]_{gs}^0}{dt} &= (-\mu - \nu_{gs} - \gamma_{2g}) [S_1I_2]_{gs}^0 + \sum_{s'} \left( \left( \frac{\tau_{gs} + \tau_{g's'}}{2} \right) [S_1I_2]_{gs}^{N_{g's'}} + \mu N_{g's'}^{[S_1I_2]_{gs}} \right) + \gamma_{1g} (1 - \sigma_{1g}) [I_1I_2]_{gs}^0 + \omega_{1g} [R_1I_2]_{gs}^0 \\
\frac{d[S_1R_2]_{gs}^0}{dt} &= (-\mu - \nu_{gs} - \omega_{2g}) [S_1R_2]_{gs}^0 + \sum_{s'} \left( \left( \frac{\tau_{gs} + \tau_{g's'}}{2} \right) [S_1R_2]_{gs}^{N_{g's'}} + \mu N_{g's'}^{[S_1R_2]_{gs}} \right) + \gamma_{1g} (1 - \sigma_{1g}) [I_1R_2]_{gs}^0 \\
&\quad + \gamma_{2g} \sigma_{2g} [S_1I_2]_{gs}^0 + \omega_{1g} [R_1R_2]_{gs}^0 \\
\frac{d[I_1S_2]_{gs}^0}{dt} &= (-\mu - \nu_{gs} - \gamma_{1g}) [I_1S_2]_{gs}^0 + \sum_{s'} \left( \left( \frac{\tau_{gs} + \tau_{g's'}}{2} \right) [I_1S_2]_{gs}^{N_{g's'}} + \mu N_{g's'}^{[I_1S_2]_{gs}} \right) + \gamma_{2g} (1 - \sigma_{2g}) [I_1I_2]_{gs}^0 + \omega_{2g} [I_1R_2]_{gs}^0 \\
\frac{d[I_1I_2]_{gs}^0}{dt} &= (-\mu - \nu_{gs} - \gamma_{1g} - \gamma_{2g}) [I_1I_2]_{gs}^0 + \sum_{s'} \left( \left( \frac{\tau_{gs} + \tau_{g's'}}{2} \right) [I_1I_2]_{gs}^{N_{g's'}} + \mu N_{g's'}^{[I_1I_2]_{gs}} \right) \\
\frac{d[I_1R_2]_{gs}^0}{dt} &= (-\mu - \nu_{gs} - \gamma_{1g} - \omega_{2g}) [I_1R_2]_{gs}^0 + \sum_{s'} \left( \left( \frac{\tau_{gs} + \tau_{g's'}}{2} \right) [I_1R_2]_{gs}^{N_{g's'}} + \mu N_{g's'}^{[I_1R_2]_{gs}} \right) + \gamma_{2g} \sigma_{2g} [I_1I_2]_{gs}^0 \\
\frac{d[R_1S_2]_{gs}^0}{dt} &= (-\mu - \nu_{gs} - \omega_{1g}) [R_1S_2]_{gs}^0 + \sum_{s'} \left( \left( \frac{\tau_{gs} + \tau_{g's'}}{2} \right) [R_1S_2]_{gs}^{N_{g's'}} + \mu N_{g's'}^{[R_1S_2]_{gs}} \right) + \gamma_{1g} \sigma_{1g} [I_1S_2]_{gs}^0 + \gamma_{2g} (1 - \sigma_{2g}) [R_1I_2]_{gs}^0 \\
&\quad + \omega_{2g} [R_1R_2]_{gs}^0 \\
\frac{d[R_1I_2]_{gs}^0}{dt} &= (-\mu - \nu_{gs} - \gamma_{2g} - \omega_{1g}) [R_1I_2]_{gs}^0 + \sum_{s'} \left( \left( \frac{\tau_{gs} + \tau_{g's'}}{2} \right) [R_1I_2]_{gs}^{N_{g's'}} + \mu N_{g's'}^{[R_1I_2]_{gs}} \right) + \gamma_{1g} \sigma_{1g} [I_1I_2]_{gs}^0 \\
\frac{d[R_1R_2]_{gs}^0}{dt} &= (-\mu - \nu_{gs} - \omega_{1g} - \omega_{2g}) [R_1R_2]_{gs}^0 + \sum_{s'} \left( \left( \frac{\tau_{gs} + \tau_{g's'}}{2} \right) [R_1R_2]_{gs}^{N_{g's'}} + \mu N_{g's'}^{[R_1R_2]_{gs}} \right) + \gamma_{1g} \sigma_{1g} [I_1R_2]_{gs}^0 \\
&\quad + \gamma_{2g} \sigma_{2g} [R_1I_2]_{gs}^0
\end{aligned}$$

## Equations for individuals in partnerships

The following are differential equations for partnered individuals. Line 1 in each differential equation represents demographic and partnership changes (population exits, sexual partnership dissolution, and sexual partnership formation). Line 2 represents changes that occur to the individual's own health states. Lines 3-4 represent changes that occur to their partner's health states.

### Individuals who have $[S_1S_2]$ partners

$$\begin{aligned}
 \frac{d[S_1S_2]_{gs}^{[S_1S_2]_{g's'}}}{dt} &= \left( \begin{aligned} & \left( -\mu - \left( \frac{\tau_{gs} + \tau_{g's'}}{2} \right) \right) [S_1S_2]_{gs}^{[S_1S_2]_{g's'}} - \mu [S_1S_2]_{g's'}^{[S_1S_2]_{gs}} + \nu_{gsg's'} \left( \frac{[S_1S_2]_{g's'}^0}{N_{g's'}^0} \right) [S_1S_2]_{gs}^0 \\ & + \gamma_{1g} (1 - \sigma_{1g}) [I_1S_2]_{gs}^{[S_1S_2]_{g's'}} + \gamma_{2g} (1 - \sigma_{2g}) [S_1I_2]_{gs}^{[S_1S_2]_{g's'}} + \omega_{1g} [R_1S_2]_{gs}^{[S_1S_2]_{g's'}} + \omega_{2g} [S_1R_2]_{gs}^{[S_1S_2]_{g's'}} \\ & + \gamma_{1g'} (1 - \sigma_{1g'}) [S_1S_2]_{gs}^{[I_1S_2]_{g's'}} + \gamma_{2g'} (1 - \sigma_{2g'}) [S_1S_2]_{gs}^{[I_1I_2]_{g's'}} + \omega_{1g'} [S_1S_2]_{gs}^{[R_1S_2]_{g's'}} + \omega_{2g'} [S_1S_2]_{gs}^{[S_1R_2]_{g's'}} \end{aligned} \right) \\
 \frac{d[S_1I_2]_{gs}^{[S_1S_2]_{g's'}}}{dt} &= \left( \begin{aligned} & \left( -\mu - \left( \frac{\tau_{gs} + \tau_{g's'}}{2} \right) \right) [S_1I_2]_{gs}^{[S_1S_2]_{g's'}} - \mu [S_1S_2]_{g's'}^{[S_1I_2]_{gs}} + \nu_{gsg's'} \left( \frac{[S_1S_2]_{g's'}^0}{N_{g's'}^0} \right) [S_1I_2]_{gs}^0 \\ & + \gamma_{1g} (1 - \sigma_{1g}) [I_1I_2]_{gs}^{[S_1S_2]_{g's'}} - \gamma_{2g} [S_1I_2]_{gs}^{[S_1S_2]_{g's'}} + \omega_{1g} [R_1I_2]_{gs}^{[S_1S_2]_{g's'}} \\ & + \gamma_{1g'} (1 - \sigma_{1g'}) [S_1I_2]_{gs}^{[I_1S_2]_{g's'}} + \gamma_{2g'} (1 - \sigma_{2g'}) [S_1I_2]_{gs}^{[S_1I_2]_{g's'}} + \omega_{1g'} [S_1I_2]_{gs}^{[R_1S_2]_{g's'}} + \omega_{2g'} [S_1I_2]_{gs}^{[S_1R_2]_{g's'}} - \lambda_{2g'} [S_1I_2]_{gs}^{[S_1S_2]_{g's'}} \end{aligned} \right) \\
 \frac{d[S_1R_2]_{gs}^{[S_1S_2]_{g's'}}}{dt} &= \left( \begin{aligned} & \left( -\mu - \left( \frac{\tau_{gs} + \tau_{g's'}}{2} \right) \right) [S_1R_2]_{gs}^{[S_1S_2]_{g's'}} - \mu [S_1S_2]_{g's'}^{[S_1R_2]_{gs}} + \nu_{gsg's'} \left( \frac{[S_1S_2]_{g's'}^0}{N_{g's'}^0} \right) [S_1R_2]_{gs}^0 \\ & + \gamma_{1g} (1 - \sigma_{1g}) [I_1R_2]_{gs}^{[S_1S_2]_{g's'}} + \gamma_{2g} \sigma_{2g} [S_1I_2]_{gs}^{[S_1S_2]_{g's'}} + \omega_{1g} [R_1R_2]_{gs}^{[S_1S_2]_{g's'}} - \omega_{2g} [S_1R_2]_{gs}^{[S_1S_2]_{g's'}} \\ & + \gamma_{1g'} (1 - \sigma_{1g'}) [S_1R_2]_{gs}^{[I_1S_2]_{g's'}} + \gamma_{2g'} (1 - \sigma_{2g'}) [S_1R_2]_{gs}^{[S_1I_2]_{g's'}} + \omega_{1g'} [S_1R_2]_{gs}^{[R_1S_2]_{g's'}} + \omega_{2g'} [S_1R_2]_{gs}^{[S_1R_2]_{g's'}} \end{aligned} \right) \\
 \frac{d[I_1S_2]_{gs}^{[S_1S_2]_{g's'}}}{dt} &= \left( \begin{aligned} & \left( -\mu - \left( \frac{\tau_{gs} + \tau_{g's'}}{2} \right) \right) [I_1S_2]_{gs}^{[S_1S_2]_{g's'}} - \mu [S_1S_2]_{g's'}^{[I_1S_2]_{gs}} + \nu_{gsg's'} \left( \frac{[S_1S_2]_{g's'}^0}{N_{g's'}^0} \right) [I_1S_2]_{gs}^0 \\ & - \gamma_{1g} [I_1S_2]_{gs}^{[S_1S_2]_{g's'}} + \gamma_{2g} (1 - \sigma_{2g}) [I_1I_2]_{gs}^{[S_1S_2]_{g's'}} + \omega_{2g} [I_1R_2]_{gs}^{[S_1S_2]_{g's'}} \\ & + \gamma_{1g'} (1 - \sigma_{1g'}) [I_1S_2]_{gs}^{[I_1S_2]_{g's'}} + \gamma_{2g'} (1 - \sigma_{2g'}) [I_1S_2]_{gs}^{[S_1I_2]_{g's'}} + \omega_{1g'} [I_1S_2]_{gs}^{[R_1S_2]_{g's'}} + \omega_{2g'} [I_1S_2]_{gs}^{[S_1R_2]_{g's'}} - \lambda_{1g'} [I_1S_2]_{gs}^{[S_1S_2]_{g's'}} \end{aligned} \right) \\
 \frac{d[I_1I_2]_{gs}^{[S_1S_2]_{g's'}}}{dt} &= \left( \begin{aligned} & \left( -\mu - \left( \frac{\tau_{gs} + \tau_{g's'}}{2} \right) \right) [I_1I_2]_{gs}^{[S_1S_2]_{g's'}} - \mu [S_1S_2]_{g's'}^{[I_1I_2]_{gs}} + \nu_{gsg's'} \left( \frac{[S_1S_2]_{g's'}^0}{N_{g's'}^0} \right) [I_1I_2]_{gs}^0 \\ & - \gamma_{1g} [I_1I_2]_{gs}^{[S_1S_2]_{g's'}} - \gamma_{2g} [I_1I_2]_{gs}^{[S_1S_2]_{g's'}} \\ & + \gamma_{1g} (1 - \sigma_{1g'}) [I_1I_2]_{gs}^{[I_1S_2]_{g's'}} + \gamma_{2g'} (1 - \sigma_{2g'}) [I_1I_2]_{gs}^{[S_1I_2]_{g's'}} + \omega_{1g'} [I_1I_2]_{gs}^{[R_1S_2]_{g's'}} + \omega_{2g'} [I_1I_2]_{gs}^{[S_1R_2]_{g's'}} \\ & - (\lambda_{1g'} - \lambda_{12g'}) [I_1I_2]_{gs}^{[S_1S_2]_{g's'}} - (\lambda_{2g'} - \lambda_{12g'}) [I_1I_2]_{gs}^{[S_1S_2]_{g's'}} - \lambda_{12g'} [I_1I_2]_{gs}^{[S_1S_2]_{g's'}} \end{aligned} \right) \\
 \frac{d[I_1R_2]_{gs}^{[S_1S_2]_{g's'}}}{dt} &= \left( \begin{aligned} & \left( -\mu - \left( \frac{\tau_{gs} + \tau_{g's'}}{2} \right) \right) [I_1R_2]_{gs}^{[S_1S_2]_{g's'}} - \mu [S_1S_2]_{g's'}^{[I_1R_2]_{gs}} + \nu_{gsg's'} \left( \frac{[S_1S_2]_{g's'}^0}{N_{g's'}^0} \right) [I_1R_2]_{gs}^0 \\ & - \gamma_{1g} [I_1R_2]_{gs}^{[S_1S_2]_{g's'}} + \gamma_{2g} \sigma_{2g} [I_1I_2]_{gs}^{[S_1S_2]_{g's'}} - \omega_{2g} [I_1R_2]_{gs}^{[S_1S_2]_{g's'}} \\ & + \gamma_{1g'} (1 - \sigma_{1g'}) [I_1R_2]_{gs}^{[I_1S_2]_{g's'}} + \gamma_{2g'} (1 - \sigma_{2g'}) [I_1R_2]_{gs}^{[S_1I_2]_{g's'}} + \omega_{1g'} [I_1R_2]_{gs}^{[R_1S_2]_{g's'}} + \omega_{2g'} [I_1R_2]_{gs}^{[S_1R_2]_{g's'}} - \lambda_{1g'} [I_1R_2]_{gs}^{[S_1S_2]_{g's'}} \end{aligned} \right)
 \end{aligned}$$

$$\begin{aligned}
\frac{d[R_1 S_2]_{gs}^{[S_1 S_2]_{g's'}}}{dt} &= \left( \begin{aligned} & \left( -\mu - \left( \frac{\tau_{gs} + \tau_{g's'}}{2} \right) \right) [R_1 S_2]_{gs}^{[S_1 S_2]_{g's'}} - \mu [S_1 S_2]_{g's'}^{[R_1 S_2]_{gs}} + \nu_{gs g's'} \left( \frac{[S_1 S_2]_{g's'}^0}{N_{g's'}^0} \right) [R_1 S_2]_{gs}^0 \\ & + \gamma_{1g} \sigma_{1g} [I_1 S_2]_{gs}^{[S_1 S_2]_{g's'}} + \gamma_{2g} (1 - \sigma_{2g}) [R_1 I_2]_{gs}^{[S_1 S_2]_{g's'}} - \omega_{1g} [R_1 S_2]_{gs}^{[S_1 S_2]_{g's'}} + \omega_{2g} [R_1 R_2]_{gs}^{[S_1 S_2]_{g's'}} \\ & + \gamma_{1g'} (1 - \sigma_{1g'}) [R_1 S_2]_{gs}^{[I_1 S_2]_{g's'}} + \gamma_{2g'} (1 - \sigma_{2g'}) [R_1 S_2]_{gs}^{[S_1 I_2]_{g's'}} + \omega_{1g'} [R_1 S_2]_{gs}^{[R_1 S_2]_{g's'}} + \omega_{2g'} [R_1 S_2]_{gs}^{[S_1 R_2]_{g's'}} \end{aligned} \right) \\
\frac{d[R_1 I_2]_{gs}^{[S_1 S_2]_{g's'}}}{dt} &= \left( \begin{aligned} & \left( -\mu - \left( \frac{\tau_{gs} + \tau_{g's'}}{2} \right) \right) [R_1 I_2]_{gs}^{[S_1 S_2]_{g's'}} - \mu [S_1 S_2]_{g's'}^{[R_1 I_2]_{gs}} + \nu_{gs g's'} \left( \frac{[S_1 S_2]_{g's'}^0}{N_{g's'}^0} \right) [R_1 I_2]_{gs}^0 \\ & + \gamma_{1g} \sigma_{1g} [I_1 I_2]_{gs}^{[S_1 S_2]_{g's'}} - \gamma_{2g} [R_1 I_2]_{gs}^{[S_1 S_2]_{g's'}} - \omega_{1g} [R_1 I_2]_{gs}^{[S_1 S_2]_{g's'}} \\ & + \gamma_{1g'} (1 - \sigma_{1g'}) [R_1 I_2]_{gs}^{[I_1 S_2]_{g's'}} + \gamma_{2g'} (1 - \sigma_{2g'}) [R_1 I_2]_{gs}^{[S_1 I_2]_{g's'}} + \omega_{1g'} [R_1 I_2]_{gs}^{[R_1 S_2]_{g's'}} + \omega_{2g'} [R_1 I_2]_{gs}^{[S_1 R_2]_{g's'}} - \lambda_{2g'} [R_1 I_2]_{gs}^{[S_1 S_2]_{g's'}} \end{aligned} \right) \\
\frac{d[R_1 R_2]_{gs}^{[S_1 S_2]_{g's'}}}{dt} &= \left( \begin{aligned} & \left( -\mu - \left( \frac{\tau_{gs} + \tau_{g's'}}{2} \right) \right) [R_1 R_2]_{gs}^{[S_1 S_2]_{g's'}} - \mu [S_1 S_2]_{g's'}^{[R_1 R_2]_{gs}} + \nu_{gs g's'} \left( \frac{[S_1 S_2]_{g's'}^0}{N_{g's'}^0} \right) [R_1 R_2]_{gs}^0 \\ & + \gamma_{1g} \sigma_{1g} [I_1 R_2]_{gs}^{[S_1 S_2]_{g's'}} + \gamma_{2g} \sigma_{2g} [R_1 I_2]_{gs}^{[S_1 S_2]_{g's'}} - \omega_{1g} [R_1 R_2]_{gs}^{[S_1 S_2]_{g's'}} - \omega_{2g} [R_1 R_2]_{gs}^{[S_1 S_2]_{g's'}} \\ & + \gamma_{1g'} (1 - \sigma_{1g'}) [R_1 R_2]_{gs}^{[I_1 S_2]_{g's'}} + \gamma_{2g'} (1 - \sigma_{2g'}) [R_1 R_2]_{gs}^{[S_1 I_2]_{g's'}} + \omega_{1g'} [R_1 R_2]_{gs}^{[R_1 S_2]_{g's'}} + \omega_{2g'} [R_1 R_2]_{gs}^{[S_1 R_2]_{g's'}} \end{aligned} \right)
\end{aligned}$$

### Individuals who have $[S_1I_2]$ partners

$$\begin{aligned} \frac{d[S_1S_2]_{gs}^{[S_1I_2]_{g's'}}}{dt} &= \left( \begin{aligned} & -\mu - \left( \frac{\tau_{gs} + \tau_{g's'}}{2} \right) \left[ S_1S_2 \right]_{gs}^{[S_1I_2]_{g's'}} - \mu [S_1I_2]_{g's'}^{[S_1S_2]_{gs}} + v_{gsg's'} \left( \frac{[S_1I_2]_{g's'}^0}{N_{g's'}^0} \right) [S_1S_2]_{gs}^0 \\ & + \gamma_{1g} (1 - \sigma_{1g}) [I_1S_2]_{gs}^{[S_1I_2]_{g's'}} + \gamma_{2g} (1 - \sigma_{2g}) [S_1I_2]_{gs}^{[S_1I_2]_{g's'}} + \omega_{1g} [R_1S]_{gs}^{[S_1I_2]_{g's'}} + \omega_{2g} [S_1R_2]_{gs}^{[S_1I_2]_{g's'}} - \lambda_{2g} [S_1S_2]_{gs}^{[S_1I_2]_{g's'}} \\ & + \gamma_{1g'} (1 - \sigma_{1g'}) [S_1S_2]_{gs}^{[I_1I_2]_{g's'}} - \gamma_{2g'} [S_1S_2]_{gs}^{[S_1I_2]_{g's'}} + \omega_{1g'} [S_1S_2]_{gs}^{[R_1I_2]_{g's'}} \end{aligned} \right) \\ \\ \frac{d[S_1I_2]_{gs}^{[S_1I_2]_{g's'}}}{dt} &= \left( \begin{aligned} & -\mu - \left( \frac{\tau_{gs} + \tau_{g's'}}{2} \right) \left[ S_1I_2 \right]_{gs}^{[S_1I_2]_{g's'}} - \mu [S_1I_2]_{g's'}^{[S_1I_2]_{gs}} + v_{gsg's'} \left( \frac{[S_1I_2]_{g's'}^0}{N_{g's'}^0} \right) [S_1I_2]_{gs}^0 \\ & + \gamma_{1g} (1 - \sigma_{1g}) [I_1I_2]_{gs}^{[S_1I_2]_{g's'}} - \gamma_{2g} [S_1I_2]_{gs}^{[S_1I_2]_{g's'}} + \omega_{1g} [R_1I_2]_{gs}^{[S_1I_2]_{g's'}} + \lambda_{2g} [S_1S_2]_{gs}^{[S_1I_2]_{g's'}} \\ & + \gamma_{1g'} (1 - \sigma_{1g'}) [S_1I_2]_{gs}^{[I_1I_2]_{g's'}} - \gamma_{2g'} [S_1I_2]_{gs}^{[S_1I_2]_{g's'}} + \omega_{1g'} [S_1I_2]_{gs}^{[R_1I_2]_{g's'}} + \lambda_{2g'} [S_1I_2]_{gs}^{[S_1S_2]_{gs}} \end{aligned} \right) \\ \\ \frac{d[S_1R_2]_{gs}^{[S_1I_2]_{g's'}}}{dt} &= \left( \begin{aligned} & -\mu - \left( \frac{\tau_{gs} + \tau_{g's'}}{2} \right) \left[ S_1R_2 \right]_{gs}^{[S_1I_2]_{g's'}} - \mu [S_1I_2]_{g's'}^{[S_1R_2]_{gs}} + v_{gsg's'} \left( \frac{[S_1I_2]_{g's'}^0}{N_{g's'}^0} \right) [S_1R_2]_{gs}^0 \\ & + \gamma_{1g} (1 - \sigma_{1g}) [I_1R_2]_{gs}^{[S_1I_2]_{g's'}} + \gamma_{2g} \sigma_{2g} [S_1I_2]_{gs}^{[S_1I_2]_{g's'}} + \omega_{1g} [R_1R_2]_{gs}^{[S_1I_2]_{g's'}} - \omega_{2g} [S_1R_2]_{gs}^{[S_1I_2]_{g's'}} \\ & + \gamma_{1g'} (1 - \sigma_{1g'}) [S_1R_2]_{gs}^{[I_1I_2]_{g's'}} - \gamma_{2g'} [S_1R_2]_{gs}^{[S_1I_2]_{g's'}} + \omega_{1g'} [S_1R_2]_{gs}^{[R_1I_2]_{g's'}} \end{aligned} \right) \end{aligned}$$

$$\begin{aligned}
\frac{d[I_1 S_2]_{gs}^{[S_1 I_2]_{g's'}}}{dt} &= \left( \begin{aligned} & -\mu - \left( \frac{\tau_{gs} + \tau_{g's'}}{2} \right) \left[ I_1 S_2 \right]_{gs}^{[S_1 I_2]_{g's'}} - \mu [S_1 I_2]_{g's'}^{[I_1 S_2]_{gs}} + \nu_{gsg's'} \left( \frac{[S_1 I_2]_{g's'}^0}{N_{g's'}^0} \right) [I_1 S_2]_{gs}^0 \\ & -\gamma_{1g} [I_1 S_2]_{gs}^{[S_1 I_2]_{g's'}} + \gamma_{2g} (1 - \sigma_{2g}) [I_1 I_2]_{gs}^{[S_1 I_2]_{g's'}} + \omega_{2g} [I_1 R_2]_{gs}^{[S_1 I_2]_{g's'}} - (\lambda_{2g} - \lambda_{1g} \gamma_{2g} \chi_{1g'}) \chi_{2g} [I_1 S_2]_{gs}^{[S_1 I_2]_{g's'}} \\ & + \gamma_{1g} (1 - \sigma_{1g'}) [I_1 S_2]_{gs}^{[I_1 I_2]_{g's'}} - \gamma_{2g'} [I_1 S_2]_{gs}^{[S_1 I_2]_{g's'}} + \omega_{1g'} [I_1 S_2]_{gs}^{[R_1 I_2]_{g's'}} - (\lambda_{1g'} - \lambda_{1g'} \gamma_{2g} \chi_{2g}) \chi_{1g'} [I_1 S_2]_{gs}^{[S_1 I_2]_{g's'}} \\ & - \lambda_{1g} \gamma_{2g} \chi_{1g'} \chi_{2g} [I_1 S_2]_{gs}^{[S_1 I_2]_{g's'}} \end{aligned} \right) \\
\frac{d[I_1 I_2]_{gs}^{[S_1 I_2]_{g's'}}}{dt} &= \left( \begin{aligned} & -\mu - \left( \frac{\tau_{gs} + \tau_{g's'}}{2} \right) \left[ I_1 I_2 \right]_{gs}^{[S_1 I_2]_{g's'}} - \mu [S_1 I_2]_{g's'}^{[I_1 I_2]_{gs}} + \nu_{gsg's'} \left( \frac{[S_1 I_2]_{g's'}^0}{N_{g's'}^0} \right) [I_1 I_2]_{gs}^0 \\ & -\gamma_{1g} [I_1 I_2]_{gs}^{[S_1 I_2]_{g's'}} - \gamma_{2g} [I_1 I_2]_{gs}^{[S_1 I_2]_{g's'}} + (\lambda_{2g} - \lambda_{1g} \gamma_{2g} \chi_{1g'}) \chi_{2g} [I_1 S_2]_{gs}^{[S_1 I_2]_{g's'}} \\ & + \gamma_{1g'} (1 - \sigma_{1g'}) [I_1 I_2]_{gs}^{[I_1 I_2]_{g's'}} - \gamma_{2g'} [I_1 I_2]_{gs}^{[S_1 I_2]_{g's'}} + \omega_{1g'} [I_1 I_2]_{gs}^{[R_1 I_2]_{g's'}} - \lambda_{1g'} \chi_{1g'} [I_1 I_2]_{gs}^{[S_1 I_2]_{g's'}} + (\lambda_{2g'} - \lambda_{12g'}) [I_1 I_2]_{gs}^{[S_1 S_2]_{g's'}} \end{aligned} \right) \\
\frac{d[I_1 R_2]_{gs}^{[S_1 I_2]_{g's'}}}{dt} &= \left( \begin{aligned} & -\mu - \left( \frac{\tau_{gs} + \tau_{g's'}}{2} \right) \left[ I_1 R_2 \right]_{gs}^{[S_1 I_2]_{g's'}} - \mu [S_1 I_2]_{g's'}^{[I_1 R_2]_{gs}} + \nu_{gsg's'} \left( \frac{[S_1 I_2]_{g's'}^0}{N_{g's'}^0} \right) [I_1 R_2]_{gs}^0 \\ & -\gamma_{1g} [I_1 R_2]_{gs}^{[S_1 I_2]_{g's'}} + \gamma_{2g} \sigma_{2g} [I_1 I_2]_{gs}^{[S_1 I_2]_{g's'}} - \omega_{2g} [I_1 R_2]_{gs}^{[S_1 I_2]_{g's'}} \\ & + \gamma_{1g'} (1 - \sigma_{1g'}) [I_1 R_2]_{gs}^{[I_1 I_2]_{g's'}} - \gamma_{2g'} [I_1 R_2]_{gs}^{[S_1 I_2]_{g's'}} + \omega_{1g'} [I_1 R_2]_{gs}^{[R_1 I_2]_{g's'}} - \lambda_{1g'} \chi_{1g'} [I_1 R_2]_{gs}^{[S_1 I_2]_{g's'}} \end{aligned} \right) \\
\frac{d[R_1 S_2]_{gs}^{[S_1 I_2]_{g's'}}}{dt} &= \left( \begin{aligned} & -\mu - \left( \frac{\tau_{gs} + \tau_{g's'}}{2} \right) \left[ R_1 S_2 \right]_{gs}^{[S_1 I_2]_{g's'}} - \mu [S_1 I_2]_{g's'}^{[R_1 S_2]_{gs}} + \nu_{gsg's'} \left( \frac{[S_1 I_2]_{g's'}^0}{N_{g's'}^0} \right) [R_1 S_2]_{gs}^0 \\ & + \gamma_{1g} \sigma_{1g} [I_1 S_2]_{gs}^{[S_1 I_2]_{g's'}} + \gamma_{2g} (1 - \sigma_{2g}) [R_1 I_2]_{gs}^{[S_1 I_2]_{g's'}} - \omega_{1g} [R_1 S_2]_{gs}^{[S_1 I_2]_{g's'}} + \omega_{2g} [R_1 R_2]_{gs}^{[S_1 I_2]_{g's'}} - \lambda_{2g} \phi_{2g} [R_1 S_2]_{gs}^{[S_1 I_2]_{g's'}} \\ & + \gamma_{1g'} (1 - \sigma_{1g'}) [R_1 S_2]_{gs}^{[I_1 I_2]_{g's'}} - \gamma_{2g'} [R_1 S_2]_{gs}^{[S_1 I_2]_{g's'}} + \omega_{1g'} [R_1 S_2]_{gs}^{[R_1 I_2]_{g's'}} \end{aligned} \right) \\
\frac{d[R_1 I_2]_{gs}^{[S_1 I_2]_{g's'}}}{dt} &= \left( \begin{aligned} & -\mu - \left( \frac{\tau_{gs} + \tau_{g's'}}{2} \right) \left[ R_1 I_2 \right]_{gs}^{[S_1 I_2]_{g's'}} - \mu [S_1 I_2]_{g's'}^{[R_1 I_2]_{gs}} + \nu_{gsg's'} \left( \frac{[S_1 I_2]_{g's'}^0}{N_{g's'}^0} \right) [R_1 I_2]_{gs}^0 \\ & + \gamma_{1g} \sigma_{1g} [I_1 I_2]_{gs}^{[S_1 I_2]_{g's'}} - \gamma_{2g} [R_1 I_2]_{gs}^{[S_1 I_2]_{g's'}} - \omega_{1g} [R_1 I_2]_{gs}^{[S_1 I_2]_{g's'}} + \lambda_{2g} \phi_{2g} [R_1 S_2]_{gs}^{[S_1 I_2]_{g's'}} \\ & + \gamma_{1g'} (1 - \sigma_{1g'}) [R_1 I_2]_{gs}^{[I_1 I_2]_{g's'}} - \gamma_{2g'} [R_1 I_2]_{gs}^{[S_1 I_2]_{g's'}} + \omega_{1g'} [R_1 I_2]_{gs}^{[R_1 I_2]_{g's'}} + \lambda_{2g'} [R_1 I_2]_{gs}^{[S_1 S_2]_{g's'}} \end{aligned} \right) \\
\frac{d[R_1 R_2]_{gs}^{[S_1 I_2]_{g's'}}}{dt} &= \left( \begin{aligned} & -\mu - \left( \frac{\tau_{gs} + \tau_{g's'}}{2} \right) \left[ R_1 R_2 \right]_{gs}^{[S_1 I_2]_{g's'}} - \mu [S_1 I_2]_{g's'}^{[R_1 R_2]_{gs}} + \nu_{gsg's'} \left( \frac{[S_1 I_2]_{g's'}^0}{N_{g's'}^0} \right) [R_1 R_2]_{gs}^0 \\ & + \gamma_{1g} \sigma_{1g} [I_1 R_2]_{gs}^{[S_1 I_2]_{g's'}} + \gamma_{2g} \sigma_{2g} [R_1 I_2]_{gs}^{[S_1 I_2]_{g's'}} - \omega_{1g} [R_1 R_2]_{gs}^{[S_1 I_2]_{g's'}} - \omega_{2g} [R_1 R_2]_{gs}^{[S_1 I_2]_{g's'}} \\ & + \gamma_{1g'} (1 - \sigma_{1g'}) [R_1 R_2]_{gs}^{[I_1 I_2]_{g's'}} - \gamma_{2g'} [R_1 R_2]_{gs}^{[S_1 I_2]_{g's'}} + \omega_{1g'} [R_1 R_2]_{gs}^{[R_1 I_2]_{g's'}} \end{aligned} \right)
\end{aligned}$$

### Individuals who have $[S_1R_2]$ partners

$$\begin{aligned}
 \frac{d[S_1S_2]_{gs}^{[S_1R_2]_{g's'}}}{dt} &= \left( \begin{aligned} &\left( -\mu - \left( \frac{\tau_{gs} + \tau_{g's'}}{2} \right) \right) [S_1S_2]_{gs}^{[S_1R_2]_{g's'}} - \mu [S_1R_2]_{g's'}^{[S_1S_2]_{gs}} + \nu_{gsg's'} \left( \frac{[S_1R_2]_{g's'}^0}{N_{g's'}^0} \right) [S_1S_2]_{gs}^0 \\ &+ \gamma_{1g} (1 - \sigma_{1g}) [I_1S_2]_{gs}^{[S_1R_2]_{g's'}} + \gamma_{2g} (1 - \sigma_{2g}) [S_1I_2]_{gs}^{[S_1R_2]_{g's'}} + \omega_{1g} [R_1S_2]_{gs}^{[S_1R_2]_{g's'}} + \omega_{2g} [S_1R_2]_{gs}^{[S_1R_2]_{g's'}} \\ &+ \gamma_{1g'} (1 - \sigma_{1g'}) [S_1S_2]_{gs}^{[I_1R_2]_{g's'}} + \gamma_{2g'} \sigma_{2g'} [S_1S_2]_{gs}^{[S_1I_2]_{g's'}} + \omega_{1g'} [S_1S_2]_{gs}^{[R_1R_2]_{g's'}} - \omega_{2g'} [S_1S_2]_{gs}^{[S_1R_2]_{g's'}} \end{aligned} \right) \\
 \\
 \frac{d[S_1I_2]_{gs}^{[S_1R_2]_{g's'}}}{dt} &= \left( \begin{aligned} &\left( -\mu - \left( \frac{\tau_{gs} + \tau_{g's'}}{2} \right) \right) [S_1I_2]_{gs}^{[S_1R_2]_{g's'}} - \mu [S_1R_2]_{g's'}^{[S_1I_2]_{gs}} + \nu_{gsg's'} \left( \frac{[S_1R_2]_{g's'}^0}{N_{g's'}^0} \right) [S_1I_2]_{gs}^0 \\ &+ \gamma_{1g} (1 - \sigma_{1g}) [I_1I_2]_{gs}^{[S_1R_2]_{g's'}} - \gamma_{2g} [S_1I_2]_{gs}^{[S_1R_2]_{g's'}} + \omega_{1g} [R_1I_2]_{gs}^{[S_1R_2]_{g's'}} \\ &+ \gamma_{1g'} (1 - \sigma_{1g'}) [S_1I_2]_{gs}^{[I_1R_2]_{g's'}} + \gamma_{2g'} \sigma_{2g'} [S_1I_2]_{gs}^{[S_1I_2]_{g's'}} + \omega_{1g'} [S_1I_2]_{gs}^{[R_1R_2]_{g's'}} - \omega_{2g'} [S_1I_2]_{gs}^{[S_1R_2]_{g's'}} \end{aligned} \right) \\
 \\
 \frac{d[S_1R_2]_{gs}^{[S_1R_2]_{g's'}}}{dt} &= \left( \begin{aligned} &\left( -\mu - \left( \frac{\tau_{gs} + \tau_{g's'}}{2} \right) \right) [S_1R_2]_{gs}^{[S_1R_2]_{g's'}} - \mu [S_1R_2]_{g's'}^{[S_1R_2]_{gs}} + \nu_{gsg's'} \left( \frac{[S_1R_2]_{g's'}^0}{N_{g's'}^0} \right) [S_1R_2]_{gs}^0 \\ &+ \gamma_{1g} (1 - \sigma_{1g}) [I_1R_2]_{gs}^{[S_1R_2]_{g's'}} + \gamma_{2g} \sigma_{2g} [S_1I_2]_{gs}^{[S_1R_2]_{g's'}} + \omega_{1g} [R_1R_2]_{gs}^{[S_1R_2]_{g's'}} - \omega_{2g} [S_1R_2]_{gs}^{[S_1R_2]_{g's'}} \\ &+ \gamma_{1g'} (1 - \sigma_{1g'}) [S_1R_2]_{gs}^{[I_1R_2]_{g's'}} + \gamma_{2g'} \sigma_{2g'} [S_1R_2]_{gs}^{[S_1I_2]_{g's'}} + \omega_{1g'} [S_1R_2]_{gs}^{[R_1R_2]_{g's'}} - \omega_{2g'} [S_1R_2]_{gs}^{[S_1R_2]_{g's'}} \end{aligned} \right)
 \end{aligned}$$



$$\begin{aligned}
\frac{d[I_1 S_2]_{gs}^{[S_1 R_2]_{g's'}}}{dt} &= \left( \begin{aligned} & -\mu - \left( \frac{\tau_{gs} + \tau_{g's'}}{2} \right) \left[ I_1 S_2 \right]_{gs}^{[S_1 R_2]_{g's'}} - \mu [S_1 R_2]_{g's'}^{[I_1 S_2]_{gs}} + \nu_{gsg's'} \left( \frac{[S_1 R_2]_{g's'}^0}{N_{g's'}^0} \right) [I_1 S_2]_{gs}^0 \\ & -\gamma_{1g} [I_1 S_2]_{gs}^{[S_1 R_2]_{g's'}} + \gamma_{2g} (1 - \sigma_{2g}) [I_1 I_2]_{gs}^{[S_1 R_2]_{g's'}} + \omega_{2g} [I_1 R_2]_{gs}^{[S_1 R_2]_{g's'}} \\ & + \gamma_{1g'} (1 - \sigma_{1g'}) [I_1 S_2]_{gs}^{[I_1 R_2]_{g's'}} + \gamma_{2g'} \sigma_{2g'} [I_1 S_2]_{gs}^{[S_1 I_2]_{g's'}} + \omega_{1g'} [I_1 S_2]_{gs}^{[R_1 R_2]_{g's'}} - \omega_{2g'} [I_1 S_2]_{gs}^{[S_1 R_2]_{g's'}} - \lambda_{1g'} \phi_{1g'} [I_1 S_2]_{gs}^{[S_1 R_2]_{g's'}} \end{aligned} \right) \\
\frac{d[I_1 I_2]_{gs}^{[S_1 R_2]_{g's'}}}{dt} &= \left( \begin{aligned} & -\mu - \left( \frac{\tau_{gs} + \tau_{g's'}}{2} \right) \left[ I_1 I_2 \right]_{gs}^{[S_1 R_2]_{g's'}} - \mu [S_1 R_2]_{g's'}^{[I_1 I_2]_{gs}} + \nu_{gsg's'} \left( \frac{[S_1 R_2]_{g's'}^0}{N_{g's'}^0} \right) [I_1 I_2]_{gs}^0 \\ & -\gamma_{1g} [I_1 I_2]_{gs}^{[S_1 R_2]_{g's'}} - \gamma_{2g} [I_1 I_2]_{gs}^{[S_1 R_2]_{g's'}} \\ & + \gamma_{1g'} (1 - \sigma_{1g'}) [I_1 I_2]_{gs}^{[I_1 R_2]_{g's'}} + \gamma_{2g'} \sigma_{2g'} [I_1 I_2]_{gs}^{[S_1 I_2]_{g's'}} + \omega_{1g'} [I_1 I_2]_{gs}^{[R_1 R_2]_{g's'}} - \omega_{2g'} [I_1 I_2]_{gs}^{[S_1 R_2]_{g's'}} - \lambda_{1g'} \phi_{1g'} [I_1 I_2]_{gs}^{[S_1 R_2]_{g's'}} \end{aligned} \right) \\
\frac{d[I_1 R_2]_{gs}^{[S_1 R_2]_{g's'}}}{dt} &= \left( \begin{aligned} & -\mu - \left( \frac{\tau_{gs} + \tau_{g's'}}{2} \right) \left[ I_1 R_2 \right]_{gs}^{[S_1 R_2]_{g's'}} - \mu [S_1 R_2]_{g's'}^{[I_1 R_2]_{gs}} + \nu_{gsg's'} \left( \frac{[S_1 R_2]_{g's'}^0}{N_{g's'}^0} \right) [I_1 R_2]_{gs}^0 \\ & -\gamma_{1g} [I_1 R_2]_{gs}^{[S_1 R_2]_{g's'}} + \gamma_{2g} \sigma_{2g} [I_1 I_2]_{gs}^{[S_1 R_2]_{g's'}} - \omega_{2g} [I_1 R_2]_{gs}^{[S_1 R_2]_{g's'}} \\ & + \gamma_{1g'} (1 - \sigma_{1g'}) [I_1 R_2]_{gs}^{[I_1 R_2]_{g's'}} + \gamma_{2g'} \sigma_{2g'} [I_1 R_2]_{gs}^{[S_1 I_2]_{g's'}} + \omega_{1g'} [I_1 R_2]_{gs}^{[R_1 R_2]_{g's'}} - \omega_{2g'} [I_1 R_2]_{gs}^{[S_1 R_2]_{g's'}} - \lambda_{1g'} \phi_{1g'} [I_1 R_2]_{gs}^{[S_1 R_2]_{g's'}} \end{aligned} \right) \\
\frac{d[R_1 S_2]_{gs}^{[S_1 R_2]_{g's'}}}{dt} &= \left( \begin{aligned} & -\mu - \left( \frac{\tau_{gs} + \tau_{g's'}}{2} \right) \left[ R_1 S_2 \right]_{gs}^{[S_1 R_2]_{g's'}} - \mu [S_1 R_2]_{g's'}^{[R_1 S_2]_{gs}} + \nu_{gsg's'} \left( \frac{[S_1 R_2]_{g's'}^0}{N_{g's'}^0} \right) [R_1 S_2]_{gs}^0 \\ & + \gamma_{1g} \sigma_{1g} [I_1 S_2]_{gs}^{[S_1 R_2]_{g's'}} + \gamma_{2g} (1 - \sigma_{2g}) [R_1 I_2]_{gs}^{[S_1 R_2]_{g's'}} - \omega_{1g} [R_1 S_2]_{gs}^{[S_1 R_2]_{g's'}} + \omega_{2g} [R_1 R_2]_{gs}^{[S_1 R_2]_{g's'}} \\ & + \gamma_{1g'} (1 - \sigma_{1g'}) [R_1 S_2]_{gs}^{[I_1 R_2]_{g's'}} + \gamma_{2g'} \sigma_{2g'} [R_1 S_2]_{gs}^{[S_1 I_2]_{g's'}} + \omega_{1g'} [R_1 S_2]_{gs}^{[R_1 R_2]_{g's'}} - \omega_{2g'} [R_1 S_2]_{gs}^{[S_1 R_2]_{g's'}} \end{aligned} \right) \\
\frac{d[R_1 I_2]_{gs}^{[S_1 R_2]_{g's'}}}{dt} &= \left( \begin{aligned} & -\mu - \left( \frac{\tau_{gs} + \tau_{g's'}}{2} \right) \left[ R_1 I_2 \right]_{gs}^{[S_1 R_2]_{g's'}} - \mu [S_1 R_2]_{g's'}^{[R_1 I_2]_{gs}} + \nu_{gsg's'} \left( \frac{[S_1 R_2]_{g's'}^0}{N_{g's'}^0} \right) [R_1 I_2]_{gs}^0 \\ & + \gamma_{1g} \sigma_{1g} [I_1 I_2]_{gs}^{[S_1 R_2]_{g's'}} - \gamma_{2g} [R_1 I_2]_{gs}^{[S_1 R_2]_{g's'}} - \omega_{1g} [R_1 I_2]_{gs}^{[S_1 R_2]_{g's'}} \\ & + \gamma_{1g'} (1 - \sigma_{1g'}) [R_1 I_2]_{gs}^{[I_1 R_2]_{g's'}} + \gamma_{2g'} \sigma_{2g'} [R_1 I_2]_{gs}^{[S_1 I_2]_{g's'}} + \omega_{1g'} [R_1 I_2]_{gs}^{[R_1 R_2]_{g's'}} - \omega_{2g'} [R_1 I_2]_{gs}^{[S_1 R_2]_{g's'}} \end{aligned} \right) \\
\frac{d[R_1 R_2]_{gs}^{[S_1 R_2]_{g's'}}}{dt} &= \left( \begin{aligned} & -\mu - \left( \frac{\tau_{gs} + \tau_{g's'}}{2} \right) \left[ R_1 R_2 \right]_{gs}^{[S_1 R_2]_{g's'}} - \mu [S_1 R_2]_{g's'}^{[R_1 R_2]_{gs}} + \nu_{gsg's'} \left( \frac{[S_1 R_2]_{g's'}^0}{N_{g's'}^0} \right) [R_1 R_2]_{gs}^0 \\ & + \gamma_{1g} \sigma_{1g} [I_1 R_2]_{gs}^{[S_1 R_2]_{g's'}} + \gamma_{2g} \sigma_{2g} [R_1 I_2]_{gs}^{[S_1 R_2]_{g's'}} - \omega_{1g} [R_1 R_2]_{gs}^{[S_1 R_2]_{g's'}} - \omega_{2g} [R_1 R_2]_{gs}^{[S_1 R_2]_{g's'}} \\ & + \gamma_{1g'} (1 - \sigma_{1g'}) [R_1 R_2]_{gs}^{[I_1 R_2]_{g's'}} + \gamma_{2g'} \sigma_{2g'} [R_1 R_2]_{gs}^{[S_1 I_2]_{g's'}} + \omega_{1g'} [R_1 R_2]_{gs}^{[R_1 R_2]_{g's'}} - \omega_{2g'} [R_1 R_2]_{gs}^{[S_1 R_2]_{g's'}} \end{aligned} \right)
\end{aligned}$$

### Individuals who have $[I_1S_2]$ partners

$$\begin{aligned}
 \frac{d[S_1S_2]_{gs}^{[I_1S_2]_{g's'}}}{dt} &= \left( \begin{aligned} &\left( -\mu - \left( \frac{\tau_{gs} + \tau_{g's'}}{2} \right) \right) [S_1S_2]_{gs}^{[I_1S_2]_{g's'}} - \mu [I_1S_2]_{g's'}^{[S_1S_2]_{gs}} + \nu_{gsg's'} \left( \frac{[I_1S_2]_{g's'}^0}{N_{g's'}^0} \right) [S_1S_2]_{gs}^0 \\ &+ \gamma_{1g} (1 - \sigma_{1g}) [I_1S_2]_{gs}^{[I_1S_2]_{g's'}} + \gamma_{2g} (1 - \sigma_{2g}) [S_1I_2]_{gs}^{[I_1S_2]_{g's'}} + \omega_{1g} [R_1S_2]_{gs}^{[I_1S_2]_{g's'}} + \omega_{2g} [S_1R_2]_{gs}^{[I_1S_2]_{g's'}} - \lambda_{1g} [S_1S_2]_{gs}^{[I_1S_2]_{g's'}} \\ &- \gamma_{1g'} [S_1S_2]_{gs}^{[I_1S_2]_{g's'}} + \gamma_{2g'} (1 - \sigma_{2g'}) [S_1S_2]_{gs}^{[I_1I_2]_{g's'}} + \omega_{2g'} [S_1S_2]_{gs}^{[I_1R_2]_{g's'}} \end{aligned} \right) \\
 \frac{d[S_1I_2]_{gs}^{[I_1S_2]_{g's'}}}{dt} &= \left( \begin{aligned} &\left( -\mu - \left( \frac{\tau_{gs} + \tau_{g's'}}{2} \right) \right) [S_1I_2]_{gs}^{[I_1S_2]_{g's'}} - \mu [I_1S_2]_{g's'}^{[S_1I_2]_{gs}} + \nu_{gsg's'} \left( \frac{[I_1S_2]_{g's'}^0}{N_{g's'}^0} \right) [S_1I_2]_{gs}^0 \\ &+ \gamma_{1g} (1 - \sigma_{1g}) [I_1I_2]_{gs}^{[I_1S_2]_{g's'}} - \gamma_{2g} [S_1I_2]_{gs}^{[I_1S_2]_{g's'}} + \omega_{1g} [R_1I_2]_{gs}^{[I_1S_2]_{g's'}} - (\lambda_{1g} - \lambda_{1g2g'} \chi_{2g'}) \chi_{1g} [S_1I_2]_{gs}^{[I_1S_2]_{g's'}} \\ &- \gamma_{1g'} [S_1I_2]_{gs}^{[I_1S_2]_{g's'}} + \gamma_{2g'} (1 - \sigma_{2g'}) [S_1I_2]_{gs}^{[I_1I_2]_{g's'}} + \omega_{2g'} [S_1I_2]_{gs}^{[I_1R_2]_{g's'}} - (\lambda_{2g'} - \lambda_{1g2g'} \chi_{1g}) \chi_{2g'} [S_1I_2]_{gs}^{[I_1S_2]_{g's'}} \\ &- \lambda_{1g2g'} \chi_{1g} \chi_{2g'} [S_1I_2]_{gs}^{[I_1S_2]_{g's'}} \end{aligned} \right) \\
 \frac{d[S_1R_2]_{gs}^{[I_1S_2]_{g's'}}}{dt} &= \left( \begin{aligned} &\left( -\mu - \left( \frac{\tau_{gs} + \tau_{g's'}}{2} \right) \right) [S_1R_2]_{gs}^{[I_1S_2]_{g's'}} - \mu [I_1S_2]_{g's'}^{[S_1R_2]_{gs}} + \nu_{gsg's'} \left( \frac{[I_1S_2]_{g's'}^0}{N_{g's'}^0} \right) [S_1R_2]_{gs}^0 \\ &+ \gamma_{1g} (1 - \sigma_{1g}) [I_1R_2]_{gs}^{[I_1S_2]_{g's'}} + \gamma_{2g} \sigma_{2g} [S_1I_2]_{gs}^{[I_1S_2]_{g's'}} + \omega_{1g} [R_1R_2]_{gs}^{[I_1S_2]_{g's'}} - \omega_{2g} [S_1R_2]_{gs}^{[I_1S_2]_{g's'}} - \lambda_{1g} \phi_{1g} [S_1R_2]_{gs}^{[I_1S_2]_{g's'}} \\ &- \gamma_{1g'} [S_1R_2]_{gs}^{[I_1S_2]_{g's'}} + \gamma_{2g'} (1 - \sigma_{2g'}) [S_1R_2]_{gs}^{[I_1I_2]_{g's'}} + \omega_{2g'} [S_1R_2]_{gs}^{[I_1R_2]_{g's'}} \end{aligned} \right)
 \end{aligned}$$

$$\begin{aligned}
\frac{d[I_1 S_2]_{gs}^{[I_1 S_2]_{g's'}}}{dt} &= \left( \begin{aligned} & -\mu - \left( \frac{\tau_{gs} + \tau_{g's'}}{2} \right) \left[ I_1 S_2 \right]_{gs}^{[I_1 S_2]_{g's'}} - \mu [I_1 S_2]_{g's'}^{[I_1 S_2]_{gs}} + \nu_{gsg's'} \left( \frac{[I_1 S_2]_{g's'}^0}{N_{g's'}^0} \right) [I_1 S_2]_{gs}^0 \\ & -\gamma_{1g} [I_1 S_2]_{gs}^{[I_1 S_2]_{g's'}} + \gamma_{2g} (1 - \sigma_{2g}) [I_1 I_2]_{gs}^{[I_1 S_2]_{g's'}} + \omega_{2g} [I_1 R_2]_{gs}^{[I_1 S_2]_{g's'}} + \lambda_{1g} [S_1 S_2]_{gs}^{[I_1 S_2]_{g's'}} \\ & -\gamma_{1g'} [I_1 S_2]_{gs}^{[I_1 S_2]_{g's'}} + \gamma_{2g'} (1 - \sigma_{2g'}) [I_1 S_2]_{gs}^{[I_1 I_2]_{g's'}} + \omega_{2g'} [I_1 S_2]_{gs}^{[I_1 R_2]_{g's'}} + \lambda_{1g'} [I_1 S_2]_{gs}^{[S_1 S_2]_{g's'}} \end{aligned} \right) \\
\frac{d[I_1 I_2]_{gs}^{[I_1 S_2]_{g's'}}}{dt} &= \left( \begin{aligned} & -\mu - \left( \frac{\tau_{gs} + \tau_{g's'}}{2} \right) \left[ I_1 I_2 \right]_{gs}^{[I_1 S_2]_{g's'}} - \mu [I_1 S_2]_{g's'}^{[I_1 I_2]_{gs}} + \nu_{gsg's'} \left( \frac{[I_1 S_2]_{g's'}^0}{N_{g's'}^0} \right) [I_1 I_2]_{gs}^0 \\ & -\gamma_{1g} [I_1 I_2]_{gs}^{[I_1 S_2]_{g's'}} - \gamma_{2g} [I_1 I_2]_{gs}^{[I_1 S_2]_{g's'}} + (\lambda_{1g} - \lambda_{1g2g'} \chi_{2g'}) \chi_{1g} [S_1 I_2]_{gs}^{[I_1 S_2]_{g's'}} \\ & -\gamma_{1g'} [I_1 I_2]_{gs}^{[I_1 S_2]_{g's'}} + \gamma_{2g'} (1 - \sigma_{2g'}) [I_1 I_2]_{gs}^{[I_1 I_2]_{g's'}} + \omega_{2g'} [I_1 I_2]_{gs}^{[I_1 R_2]_{g's'}} + (\lambda_{1g'} - \lambda_{12g'}) [I_1 I_2]_{gs}^{[S_1 S_2]_{g's'}} - \lambda_{2g'} \chi_{2g'} [I_1 I_2]_{gs}^{[I_1 S_2]_{g's'}} \end{aligned} \right) \\
\frac{d[I_1 R_2]_{gs}^{[I_1 S_2]_{g's'}}}{dt} &= \left( \begin{aligned} & -\mu - \left( \frac{\tau_{gs} + \tau_{g's'}}{2} \right) \left[ I_1 R_2 \right]_{gs}^{[I_1 S_2]_{g's'}} - \mu [I_1 S_2]_{g's'}^{[I_1 R_2]_{gs}} + \nu_{gsg's'} \left( \frac{[I_1 S_2]_{g's'}^0}{N_{g's'}^0} \right) [I_1 R_2]_{gs}^0 \\ & -\gamma_{1g} [I_1 R_2]_{gs}^{[I_1 S_2]_{g's'}} + \gamma_{2g} \sigma_{2g} [I_1 I_2]_{gs}^{[I_1 S_2]_{g's'}} - \omega_{2g} [I_1 R_2]_{gs}^{[I_1 S_2]_{g's'}} + \lambda_{1g} \phi_{1g} [S_1 R_2]_{gs}^{[I_1 S_2]_{g's'}} \\ & -\gamma_{1g'} [I_1 R_2]_{gs}^{[I_1 S_2]_{g's'}} + \gamma_{2g'} (1 - \sigma_{2g'}) [I_1 R_2]_{gs}^{[I_1 I_2]_{g's'}} + \omega_{2g'} [I_1 R_2]_{gs}^{[I_1 R_2]_{g's'}} + \lambda_{1g'} [I_1 R_2]_{gs}^{[S_1 S_2]_{g's'}} \end{aligned} \right) \\
\frac{d[R_1 S_2]_{gs}^{[I_1 S_2]_{g's'}}}{dt} &= \left( \begin{aligned} & -\mu - \left( \frac{\tau_{gs} + \tau_{g's'}}{2} \right) \left[ R_1 S_2 \right]_{gs}^{[I_1 S_2]_{g's'}} - \mu [I_1 S_2]_{g's'}^{[R_1 S_2]_{gs}} + \nu_{gsg's'} \left( \frac{[I_1 S_2]_{g's'}^0}{N_{g's'}^0} \right) [R_1 S_2]_{gs}^0 \\ & +\gamma_{1g} \sigma_{1g} [I_1 S_2]_{gs}^{[I_1 S_2]_{g's'}} + \gamma_{2g} (1 - \sigma_{2g}) [R_1 I_2]_{gs}^{[I_1 S_2]_{g's'}} - \omega_{1g} [R_1 S_2]_{gs}^{[I_1 S_2]_{g's'}} + \omega_{2g} [R_1 R_2]_{gs}^{[I_1 S_2]_{g's'}} \\ & -\gamma_{1g'} [R_1 S_2]_{gs}^{[I_1 S_2]_{g's'}} + \gamma_{2g'} (1 - \sigma_{2g'}) [R_1 S_2]_{gs}^{[I_1 I_2]_{g's'}} + \omega_{2g'} [R_1 S_2]_{gs}^{[I_1 R_2]_{g's'}} \end{aligned} \right) \\
\frac{d[R_1 I_2]_{gs}^{[I_1 S_2]_{g's'}}}{dt} &= \left( \begin{aligned} & -\mu - \left( \frac{\tau_{gs} + \tau_{g's'}}{2} \right) \left[ R_1 I_2 \right]_{gs}^{[I_1 S_2]_{g's'}} - \mu [I_1 S_2]_{g's'}^{[R_1 I_2]_{gs}} + \nu_{gsg's'} \left( \frac{[I_1 S_2]_{g's'}^0}{N_{g's'}^0} \right) [R_1 I_2]_{gs}^0 \\ & +\gamma_{1g} \sigma_{1g} [I_1 I_2]_{gs}^{[I_1 S_2]_{g's'}} - \gamma_{2g} [R_1 I_2]_{gs}^{[I_1 S_2]_{g's'}} - \omega_{1g} [R_1 I_2]_{gs}^{[I_1 S_2]_{g's'}} \\ & -\gamma_{1g'} [R_1 I_2]_{gs}^{[I_1 S_2]_{g's'}} + \gamma_{2g'} (1 - \sigma_{2g'}) [R_1 I_2]_{gs}^{[I_1 I_2]_{g's'}} + \omega_{2g'} [R_1 I_2]_{gs}^{[I_1 R_2]_{g's'}} - \lambda_{2g'} \chi_{2g'} [R_1 I_2]_{gs}^{[I_1 S_2]_{g's'}} \end{aligned} \right) \\
\frac{d[R_1 R_2]_{gs}^{[I_1 S_2]_{g's'}}}{dt} &= \left( \begin{aligned} & -\mu - \left( \frac{\tau_{gs} + \tau_{g's'}}{2} \right) \left[ R_1 R_2 \right]_{gs}^{[I_1 S_2]_{g's'}} - \mu [I_1 S_2]_{g's'}^{[R_1 R_2]_{gs}} + \nu_{gsg's'} \left( \frac{[I_1 S_2]_{g's'}^0}{N_{g's'}^0} \right) [R_1 R_2]_{gs}^0 \\ & +\gamma_{1g} \sigma_{1g} [I_1 R_2]_{gs}^{[I_1 S_2]_{g's'}} + \gamma_{2g} \sigma_{2g} [R_1 I_2]_{gs}^{[I_1 S_2]_{g's'}} - \omega_{1g} [R_1 R_2]_{gs}^{[I_1 S_2]_{g's'}} - \omega_{2g} [R_1 R_2]_{gs}^{[I_1 S_2]_{g's'}} \\ & -\gamma_{1g'} [R_1 R_2]_{gs}^{[I_1 S_2]_{g's'}} + \gamma_{2g'} (1 - \sigma_{2g'}) [R_1 R_2]_{gs}^{[I_1 I_2]_{g's'}} + \omega_{2g'} [R_1 R_2]_{gs}^{[I_1 R_2]_{g's'}} \end{aligned} \right)
\end{aligned}$$

### Individuals who have $[I_1I_2]$ partners

$$\begin{aligned}
 \frac{d[S_1S_2]_{gs}^{[I_1I_2]_{g's'}}}{dt} &= \left( \begin{aligned}
 &\left( -\mu - \left( \frac{\tau_{gs} + \tau_{g's'}}{2} \right) \right) [S_1S_2]_{gs}^{[I_1I_2]_{g's'}} - \mu [I_1I_2]_{g's'}^{[S_1S_2]_{gs}} + \nu_{gs g's'} \left( \frac{[I_1I_2]_{g's'}^0}{N_{g's'}^0} \right) [S_1S_2]_{gs}^0 \\
 &+ \gamma_{1g} (1 - \sigma_{1g}) [I_1S_2]_{gs}^{[I_1I_2]_{g's'}} + \gamma_{2g} (1 - \sigma_{2g}) [S_1I_2]_{gs}^{[I_1I_2]_{g's'}} + \omega_{1g} [R_1S_2]_{gs}^{[I_1I_2]_{g's'}} + \omega_{2g} [S_1R_2]_{gs}^{[I_1I_2]_{g's'}} \\
 &- (\lambda_{1g} - \lambda_{12g}) [S_1S_2]_{gs}^{[I_1I_2]_{g's'}} - (\lambda_{2g} - \lambda_{12g}) [S_1S_2]_{gs}^{[I_1I_2]_{g's'}} - \lambda_{12g} [S_1S_2]_{gs}^{[I_1I_2]_{g's'}} \\
 &- \gamma_{1g'} [S_1S_2]_{gs}^{[I_1I_2]_{g's'}} - \gamma_{2g'} [S_1S_2]_{gs}^{[I_1I_2]_{g's'}}
 \end{aligned} \right) \\
 \\
 \frac{d[S_1I_2]_{gs}^{[I_1I_2]_{g's'}}}{dt} &= \left( \begin{aligned}
 &\left( -\mu - \left( \frac{\tau_{gs} + \tau_{g's'}}{2} \right) \right) [S_1I_2]_{gs}^{[I_1I_2]_{g's'}} - \mu [I_1I_2]_{g's'}^{[S_1I_2]_{gs}} + \nu_{gs g's'} \left( \frac{[I_1I_2]_{g's'}^0}{N_{g's'}^0} \right) [S_1I_2]_{gs}^0 \\
 &+ \gamma_{1g} (1 - \sigma_{1g}) [I_1I_2]_{gs}^{[I_1I_2]_{g's'}} - \gamma_{2g} [S_1I_2]_{gs}^{[I_1I_2]_{g's'}} + \omega_{1g} [R_1I_2]_{gs}^{[I_1I_2]_{g's'}} - \lambda_{1g} \chi_{1g} [S_1I_2]_{gs}^{[I_1I_2]_{g's'}} + (\lambda_{2g} - \lambda_{12g}) [S_1S_2]_{gs}^{[I_1I_2]_{g's'}} \\
 &- \gamma_{1g'} [S_1I_2]_{gs}^{[I_1I_2]_{g's'}} - \gamma_{2g'} [S_1I_2]_{gs}^{[I_1I_2]_{g's'}} + (\lambda_{2g'} - \lambda_{1g2g'} \chi_{1g}) \chi_{2g'} [S_1I_2]_{gs}^{[I_1I_2]_{g's'}}
 \end{aligned} \right) \\
 \\
 \frac{d[S_1R_2]_{gs}^{[I_1I_2]_{g's'}}}{dt} &= \left( \begin{aligned}
 &\left( -\mu - \left( \frac{\tau_{gs} + \tau_{g's'}}{2} \right) \right) [S_1R_2]_{gs}^{[I_1I_2]_{g's'}} - \mu [I_1I_2]_{g's'}^{[S_1R_2]_{gs}} + \nu_{gs g's'} \left( \frac{[I_1I_2]_{g's'}^0}{N_{g's'}^0} \right) [S_1R_2]_{gs}^0 \\
 &+ \gamma_{1g} (1 - \sigma_{1g}) [I_1R_2]_{gs}^{[I_1I_2]_{g's'}} + \gamma_{2g} \sigma_{2g} [S_1I_2]_{gs}^{[I_1I_2]_{g's'}} + \omega_{1g} [R_1R_2]_{gs}^{[I_1I_2]_{g's'}} - \omega_{2g} [S_1R_2]_{gs}^{[I_1I_2]_{g's'}} - \lambda_{1g} \phi_{1g} [S_1R_2]_{gs}^{[I_1I_2]_{g's'}} \\
 &- \gamma_{1g'} [S_1R_2]_{gs}^{[I_1I_2]_{g's'}} - \gamma_{2g'} [S_1R_2]_{gs}^{[I_1I_2]_{g's'}}
 \end{aligned} \right)
 \end{aligned}$$

$$\begin{aligned}
\frac{d[I_1 S_2]_{gs}^{[I_1 I_2]_{g's'}}}{dt} &= \left( \begin{aligned} & -\mu - \left( \frac{\tau_{gs} + \tau_{g's'}}{2} \right) \left[ I_1 S_2 \right]_{gs}^{[I_1 I_2]_{g's'}} - \mu [I_1 I_2]_{g's'}^{[I_1 S_2]_{gs}} + \nu_{gsg's'} \left( \frac{[I_1 I_2]_{g's'}^0}{N_{g's'}^0} \right) [I_1 S_2]_{gs}^0 \\ & -\gamma_{1g} [I_1 S_2]_{gs}^{[I_1 I_2]_{g's'}} + \gamma_{2g} (1 - \sigma_{2g}) [I_1 I_2]_{gs}^{[I_1 I_2]_{g's'}} + \omega_{2g} [I_1 R_2]_{gs}^{[I_1 I_2]_{g's'}} + (\lambda_{1g} - \lambda_{12g}) [S_1 S_2]_{gs}^{[I_1 I_2]_{g's'}} - \lambda_{2g} \chi_{2g} [I_1 S_2]_{gs}^{[I_1 I_2]_{g's'}} \\ & -\gamma_{1g'} [I_1 S_2]_{gs}^{[I_1 I_2]_{g's'}} - \gamma_{2g'} [I_1 S_2]_{gs}^{[I_1 I_2]_{g's'}} + (\lambda_{1g'} - \lambda_{1g'2g} \chi_{2g}) \chi_{1g'} [I_1 S_2]_{gs}^{[S_1 I_2]_{g's'}} \end{aligned} \right) \\
\frac{d[I_1 I_2]_{gs}^{[I_1 I_2]_{g's'}}}{dt} &= \left( \begin{aligned} & -\mu - \left( \frac{\tau_{gs} + \tau_{g's'}}{2} \right) \left[ I_1 I_2 \right]_{gs}^{[I_1 I_2]_{g's'}} - \mu [I_1 I_2]_{g's'}^{[I_1 I_2]_{gs}} + \nu_{gsg's'} \left( \frac{[I_1 I_2]_{g's'}^0}{N_{g's'}^0} \right) [I_1 I_2]_{gs}^0 \\ & -\gamma_{1g} [I_1 I_2]_{gs}^{[I_1 I_2]_{g's'}} - \gamma_{2g} [I_1 I_2]_{gs}^{[I_1 I_2]_{g's'}} + \lambda_{1g} \chi_{1g} [S_1 I_2]_{gs}^{[I_1 I_2]_{g's'}} + \lambda_{2g} \chi_{2g} [I_1 S_2]_{gs}^{[I_1 I_2]_{g's'}} + \lambda_{12g} [S_1 S_2]_{gs}^{[I_1 I_2]_{g's'}} \\ & -\gamma_{1g'} [I_1 I_2]_{gs}^{[I_1 I_2]_{g's'}} - \gamma_{2g'} [I_1 I_2]_{gs}^{[I_1 I_2]_{g's'}} + \lambda_{1g'} \chi_{1g'} [I_1 I_2]_{gs}^{[S_1 I_2]_{g's'}} + \lambda_{2g'} \chi_{2g'} [I_1 I_2]_{gs}^{[I_1 S_2]_{g's'}} + \lambda_{12g'} [I_1 I_2]_{gs}^{[S_1 S_2]_{g's'}} \\ & + \lambda_{1g'2g'} \chi_{1g'} \chi_{2g'} [S_1 I_2]_{gs}^{[I_1 S_2]_{g's'}} + \lambda_{1g'2g} \chi_{1g'} \chi_{2g} [I_1 S_2]_{gs}^{[S_1 I_2]_{g's'}} \end{aligned} \right) \\
\frac{d[I_1 R_2]_{gs}^{[I_1 I_2]_{g's'}}}{dt} &= \left( \begin{aligned} & -\mu - \left( \frac{\tau_{gs} + \tau_{g's'}}{2} \right) \left[ I_1 R_2 \right]_{gs}^{[I_1 I_2]_{g's'}} - \mu [I_1 I_2]_{g's'}^{[I_1 R_2]_{gs}} + \nu_{gsg's'} \left( \frac{[I_1 I_2]_{g's'}^0}{N_{g's'}^0} \right) [I_1 R_2]_{gs}^0 \\ & -\gamma_{1g} [I_1 R_2]_{gs}^{[I_1 I_2]_{g's'}} + \gamma_{2g} \sigma_{2g} [I_1 I_2]_{gs}^{[I_1 I_2]_{g's'}} - \omega_{2g} [I_1 R_2]_{gs}^{[I_1 I_2]_{g's'}} + \lambda_{1g} \phi_{1g} [S_1 R_2]_{gs}^{[I_1 I_2]_{g's'}} \\ & -\gamma_{1g'} [I_1 R_2]_{gs}^{[I_1 I_2]_{g's'}} - \gamma_{2g'} [I_1 R_2]_{gs}^{[I_1 I_2]_{g's'}} + \lambda_{1g'} \chi_{1g'} [I_1 R_2]_{gs}^{[S_1 I_2]_{g's'}} \end{aligned} \right) \\
\frac{d[R_1 S_2]_{gs}^{[I_1 I_2]_{g's'}}}{dt} &= \left( \begin{aligned} & -\mu - \left( \frac{\tau_{gs} + \tau_{g's'}}{2} \right) \left[ R_1 S_2 \right]_{gs}^{[I_1 I_2]_{g's'}} - \mu [I_1 I_2]_{g's'}^{[R_1 S_2]_{gs}} + \nu_{gsg's'} \left( \frac{[I_1 I_2]_{g's'}^0}{N_{g's'}^0} \right) [R_1 S_2]_{gs}^0 \\ & + \gamma_{1g} \sigma_{1g} [I_1 S_2]_{gs}^{[I_1 I_2]_{g's'}} + \gamma_{2g} (1 - \sigma_{2g}) [R_1 I_2]_{gs}^{[I_1 I_2]_{g's'}} - \omega_{1g} [R_1 S_2]_{gs}^{[I_1 I_2]_{g's'}} + \omega_{2g} [R_1 R_2]_{gs}^{[I_1 I_2]_{g's'}} - \lambda_{2g} \phi_{2g} [R_1 S_2]_{gs}^{[I_1 I_2]_{g's'}} \\ & -\gamma_{1g'} [R_1 S_2]_{gs}^{[I_1 I_2]_{g's'}} - \gamma_{2g'} [R_1 S_2]_{gs}^{[I_1 I_2]_{g's'}} \end{aligned} \right) \\
\frac{d[R_1 I_2]_{gs}^{[I_1 I_2]_{g's'}}}{dt} &= \left( \begin{aligned} & -\mu - \left( \frac{\tau_{gs} + \tau_{g's'}}{2} \right) \left[ R_1 I_2 \right]_{gs}^{[I_1 I_2]_{g's'}} - \mu [I_1 I_2]_{g's'}^{[R_1 I_2]_{gs}} + \nu_{gsg's'} \left( \frac{[I_1 I_2]_{g's'}^0}{N_{g's'}^0} \right) [R_1 I_2]_{gs}^0 \\ & + \gamma_{1g} \sigma_{1g} [I_1 I_2]_{gs}^{[I_1 I_2]_{g's'}} - \gamma_{2g} [R_1 I_2]_{gs}^{[I_1 I_2]_{g's'}} - \omega_{1g} [R_1 I_2]_{gs}^{[I_1 I_2]_{g's'}} + \lambda_{2g} \phi_{2g} [R_1 S_2]_{gs}^{[I_1 I_2]_{g's'}} \\ & -\gamma_{1g'} [R_1 I_2]_{gs}^{[I_1 I_2]_{g's'}} - \gamma_{2g'} [R_1 I_2]_{gs}^{[I_1 I_2]_{g's'}} + \lambda_{2g'} \chi_{2g'} [R_1 I_2]_{gs}^{[I_1 S_2]_{g's'}} \end{aligned} \right) \\
\frac{d[R_1 R_2]_{gs}^{[I_1 I_2]_{g's'}}}{dt} &= \left( \begin{aligned} & -\mu - \left( \frac{\tau_{gs} + \tau_{g's'}}{2} \right) \left[ R_1 R_2 \right]_{gs}^{[I_1 I_2]_{g's'}} - \mu [I_1 I_2]_{g's'}^{[R_1 R_2]_{gs}} + \nu_{gsg's'} \left( \frac{[I_1 I_2]_{g's'}^0}{N_{g's'}^0} \right) [R_1 R_2]_{gs}^0 \\ & + \gamma_{1g} \sigma_{1g} [I_1 R_2]_{gs}^{[I_1 I_2]_{g's'}} + \gamma_{2g} \sigma_{2g} [R_1 I_2]_{gs}^{[I_1 I_2]_{g's'}} - \omega_{1g} [R_1 R_2]_{gs}^{[I_1 I_2]_{g's'}} - \omega_{2g} [R_1 R_2]_{gs}^{[I_1 I_2]_{g's'}} \\ & -\gamma_{1g'} [R_1 R_2]_{gs}^{[I_1 I_2]_{g's'}} - \gamma_{2g'} [R_1 R_2]_{gs}^{[I_1 I_2]_{g's'}} \end{aligned} \right)
\end{aligned}$$

### Individuals who have [I1R2] partners

$$\begin{aligned}
 \frac{d[S_1 S_2]_{gs}^{[I_1 R_2]_{g's'}}}{dt} &= \left( \begin{aligned}
 &\left( -\mu - \left( \frac{\tau_{gs} + \tau_{g's'}}{2} \right) \right) [S_1 S_2]_{gs}^{[I_1 R_2]_{g's'}} - \mu [I_1 R_2]_{g's'}^{[S_1 S_2]_{gs}} + \nu_{gsg's'} \left( \frac{[I_1 R_2]_{g's'}^0}{N_{g's'}^0} \right) [S_1 S_2]_{gs}^0 \\
 &+ \gamma_{1g} (1 - \sigma_{1g}) [I_1 S_2]_{gs}^{[I_1 R_2]_{g's'}} + \gamma_{2g} (1 - \sigma_{2g}) [S_1 I_2]_{gs}^{[I_1 R_2]_{g's'}} + \omega_{1g} [R_1 S_2]_{gs}^{[I_1 R_2]_{g's'}} + \omega_{2g} [S_1 R_2]_{gs}^{[I_1 R_2]_{g's'}} - \lambda_{1g} [S_1 S_2]_{gs}^{[I_1 R_2]_{g's'}} \\
 &- \gamma_{1g'} [S_1 S_2]_{gs}^{[I_1 R_2]_{g's'}} + \gamma_{2g'} \sigma_{2g'} [S_1 S_2]_{gs}^{[I_1 R_2]_{g's'}} - \omega_{2g'} [S_1 S_2]_{gs}^{[I_1 R_2]_{g's'}}
 \end{aligned} \right) \\
 \\
 \frac{d[S_1 I_2]_{gs}^{[I_1 R_2]_{g's'}}}{dt} &= \left( \begin{aligned}
 &\left( -\mu - \left( \frac{\tau_{gs} + \tau_{g's'}}{2} \right) \right) [S_1 I_2]_{gs}^{[I_1 R_2]_{g's'}} - \mu [I_1 R_2]_{g's'}^{[S_1 I_2]_{gs}} + \nu_{gsg's'} \left( \frac{[I_1 R_2]_{g's'}^0}{N_{g's'}^0} \right) [S_1 I_2]_{gs}^0 \\
 &+ \gamma_{1g} (1 - \sigma_{1g}) [I_1 I_2]_{gs}^{[I_1 R_2]_{g's'}} - \gamma_{2g} [S_1 I_2]_{gs}^{[I_1 R_2]_{g's'}} + \omega_{1g} [R_1 I_2]_{gs}^{[I_1 R_2]_{g's'}} - \lambda_{1g} \chi_{1g} [S_1 I_2]_{gs}^{[I_1 R_2]_{g's'}} \\
 &- \gamma_{1g'} [S_1 I_2]_{gs}^{[I_1 R_2]_{g's'}} + \gamma_{2g'} \sigma_{2g'} [S_1 I_2]_{gs}^{[I_1 R_2]_{g's'}} - \omega_{2g'} [S_1 I_2]_{gs}^{[I_1 R_2]_{g's'}}
 \end{aligned} \right) \\
 \\
 \frac{d[S_1 R_2]_{gs}^{[I_1 R_2]_{g's'}}}{dt} &= \left( \begin{aligned}
 &\left( -\mu - \left( \frac{\tau_{gs} + \tau_{g's'}}{2} \right) \right) [S_1 R_2]_{gs}^{[I_1 R_2]_{g's'}} - \mu [I_1 R_2]_{g's'}^{[S_1 R_2]_{gs}} + \nu_{gsg's'} \left( \frac{[I_1 R_2]_{g's'}^0}{N_{g's'}^0} \right) [S_1 R_2]_{gs}^0 \\
 &+ \gamma_{1g} (1 - \sigma_{1g}) [I_1 R_2]_{gs}^{[I_1 R_2]_{g's'}} + \gamma_{2g} \sigma_{2g} [S_1 I_2]_{gs}^{[I_1 R_2]_{g's'}} + \omega_{1g} [R_1 R_2]_{gs}^{[I_1 R_2]_{g's'}} - \omega_{2g} [S_1 R_2]_{gs}^{[I_1 R_2]_{g's'}} - \lambda_{1g} \phi_{1g} [S_1 R_2]_{gs}^{[I_1 R_2]_{g's'}} \\
 &- \gamma_{1g'} [S_1 R_2]_{gs}^{[I_1 R_2]_{g's'}} + \gamma_{2g'} \sigma_{2g'} [S_1 R_2]_{gs}^{[I_1 R_2]_{g's'}} - \omega_{2g'} [S_1 R_2]_{gs}^{[I_1 R_2]_{g's'}}
 \end{aligned} \right)
 \end{aligned}$$

$$\begin{aligned}
\frac{d[I_1 S_2]_{gs}^{[I_1 R_2]_{g's'}}}{dt} &= \left( \begin{aligned} & \left( -\mu - \left( \frac{\tau_{gs} + \tau_{g's'}}{2} \right) \right) [I_1 S_2]_{gs}^{[I_1 R_2]_{g's'}} - \mu [I_1 R_2]_{g's'}^{[I_1 S_2]_{gs}} + \nu_{gs g's'} \left( \frac{[I_1 R_2]_{g's'}^0}{N_{g's'}^0} \right) [I_1 S_2]_{gs}^0 \\ & - \gamma_{1g} [I_1 S_2]_{gs}^{[I_1 R_2]_{g's'}} + \gamma_{2g} (1 - \sigma_{2g}) [I_1 I_2]_{gs}^{[I_1 R_2]_{g's'}} + \omega_{2g} [I_1 R_2]_{gs}^{[I_1 R_2]_{g's'}} + \lambda_{1g} [S_1 S_2]_{gs}^{[I_1 R_2]_{g's'}} \\ & - \gamma_{1g'} [I_1 S_2]_{gs}^{[I_1 R_2]_{g's'}} + \gamma_{2g'} \sigma_{2g'} [I_1 S_2]_{gs}^{[I_1 I_2]_{g's'}} - \omega_{2g'} [I_1 S_2]_{gs}^{[I_1 R_2]_{g's'}} + \lambda_{1g'} \phi_{1g'} [I_1 S_2]_{gs}^{[S_1 R_2]_{g's'}} \end{aligned} \right) \\
\frac{d[I_1 I_2]_{gs}^{[I_1 R_2]_{g's'}}}{dt} &= \left( \begin{aligned} & \left( -\mu - \left( \frac{\tau_{gs} + \tau_{g's'}}{2} \right) \right) [I_1 I_2]_{gs}^{[I_1 R_2]_{g's'}} - \mu [I_1 R_2]_{g's'}^{[I_1 I_2]_{gs}} + \nu_{gs g's'} \left( \frac{[I_1 R_2]_{g's'}^0}{N_{g's'}^0} \right) [I_1 I_2]_{gs}^0 \\ & - \gamma_{1g} [I_1 I_2]_{gs}^{[I_1 R_2]_{g's'}} - \gamma_{2g} [I_1 I_2]_{gs}^{[I_1 R_2]_{g's'}} + \lambda_{1g} \chi_{1g} [S_1 I_2]_{gs}^{[I_1 R_2]_{g's'}} \\ & - \gamma_{1g'} [I_1 I_2]_{gs}^{[I_1 R_2]_{g's'}} + \gamma_{2g'} \sigma_{2g'} [I_1 I_2]_{gs}^{[I_1 I_2]_{g's'}} - \omega_{2g'} [I_1 I_2]_{gs}^{[I_1 R_2]_{g's'}} + \lambda_{1g'} \phi_{1g'} [I_1 I_2]_{gs}^{[S_1 R_2]_{g's'}} \end{aligned} \right) \\
\frac{d[I_1 R_2]_{gs}^{[I_1 R_2]_{g's'}}}{dt} &= \left( \begin{aligned} & \left( -\mu - \left( \frac{\tau_{gs} + \tau_{g's'}}{2} \right) \right) [I_1 R_2]_{gs}^{[I_1 R_2]_{g's'}} - \mu [I_1 R_2]_{g's'}^{[I_1 R_2]_{gs}} + \nu_{gs g's'} \left( \frac{[I_1 R_2]_{g's'}^0}{N_{g's'}^0} \right) [I_1 R_2]_{gs}^0 \\ & - \gamma_{1g} [I_1 R_2]_{gs}^{[I_1 R_2]_{g's'}} + \gamma_{2g} \sigma_{2g} [I_1 I_2]_{gs}^{[I_1 R_2]_{g's'}} - \omega_{2g} [I_1 R_2]_{gs}^{[I_1 R_2]_{g's'}} + \lambda_{1g} \phi_{1g} [S_1 R_2]_{gs}^{[I_1 R_2]_{g's'}} \\ & - \gamma_{1g'} [I_1 R_2]_{gs}^{[I_1 R_2]_{g's'}} + \gamma_{2g'} \sigma_{2g'} [I_1 R_2]_{gs}^{[I_1 I_2]_{g's'}} - \omega_{2g'} [I_1 R_2]_{gs}^{[I_1 R_2]_{g's'}} + \lambda_{1g'} \phi_{1g'} [I_1 R_2]_{gs}^{[S_1 R_2]_{g's'}} \end{aligned} \right) \\
\frac{d[R_1 S_2]_{gs}^{[I_1 R_2]_{g's'}}}{dt} &= \left( \begin{aligned} & \left( -\mu - \left( \frac{\tau_{gs} + \tau_{g's'}}{2} \right) \right) [R_1 S_2]_{gs}^{[I_1 R_2]_{g's'}} - \mu [I_1 R_2]_{g's'}^{[R_1 S_2]_{gs}} + \nu_{gs g's'} \left( \frac{[I_1 R_2]_{g's'}^0}{N_{g's'}^0} \right) [R_1 S_2]_{gs}^0 \\ & + \gamma_{1g} \sigma_{1g} [I_1 S_2]_{gs}^{[I_1 R_2]_{g's'}} + \gamma_{2g} (1 - \sigma_{2g}) [R_1 I_2]_{gs}^{[I_1 R_2]_{g's'}} - \omega_{1g} [R_1 S_2]_{gs}^{[I_1 R_2]_{g's'}} + \omega_{2g} [R_1 R_2]_{gs}^{[I_1 R_2]_{g's'}} \\ & - \gamma_{1g'} [R_1 S_2]_{gs}^{[I_1 R_2]_{g's'}} + \gamma_{2g'} \sigma_{2g'} [R_1 S_2]_{gs}^{[I_1 I_2]_{g's'}} - \omega_{2g'} [R_1 S_2]_{gs}^{[I_1 R_2]_{g's'}} \end{aligned} \right) \\
\frac{d[R_1 I_2]_{gs}^{[I_1 R_2]_{g's'}}}{dt} &= \left( \begin{aligned} & \left( -\mu - \left( \frac{\tau_{gs} + \tau_{g's'}}{2} \right) \right) [R_1 I_2]_{gs}^{[I_1 R_2]_{g's'}} - \mu [I_1 R_2]_{g's'}^{[R_1 I_2]_{gs}} + \nu_{gs g's'} \left( \frac{[I_1 R_2]_{g's'}^0}{N_{g's'}^0} \right) [R_1 I_2]_{gs}^0 \\ & + \gamma_{1g} \sigma_{1g} [I_1 I_2]_{gs}^{[I_1 R_2]_{g's'}} - \gamma_{2g} [R_1 I_2]_{gs}^{[I_1 R_2]_{g's'}} - \omega_{1g} [R_1 I_2]_{gs}^{[I_1 R_2]_{g's'}} \\ & - \gamma_{1g'} [R_1 I_2]_{gs}^{[I_1 R_2]_{g's'}} + \gamma_{2g'} \sigma_{2g'} [R_1 I_2]_{gs}^{[I_1 I_2]_{g's'}} - \omega_{2g'} [R_1 I_2]_{gs}^{[I_1 R_2]_{g's'}} \end{aligned} \right) \\
\frac{d[R_1 R_2]_{gs}^{[I_1 R_2]_{g's'}}}{dt} &= \left( \begin{aligned} & \left( -\mu - \left( \frac{\tau_{gs} + \tau_{g's'}}{2} \right) \right) [R_1 R_2]_{gs}^{[I_1 R_2]_{g's'}} - \mu [I_1 R_2]_{g's'}^{[R_1 R_2]_{gs}} + \nu_{gs g's'} \left( \frac{[I_1 R_2]_{g's'}^0}{N_{g's'}^0} \right) [R_1 R_2]_{gs}^0 \\ & + \gamma_{1g} \sigma_{1g} [I_1 R_2]_{gs}^{[I_1 R_2]_{g's'}} + \gamma_{2g} \sigma_{2g} [R_1 I_2]_{gs}^{[I_1 R_2]_{g's'}} - \omega_{1g} [R_1 R_2]_{gs}^{[I_1 R_2]_{g's'}} - \omega_{2g} [R_1 R_2]_{gs}^{[I_1 R_2]_{g's'}} \\ & - \gamma_{1g'} [R_1 R_2]_{gs}^{[I_1 R_2]_{g's'}} + \gamma_{2g'} \sigma_{2g'} [R_1 R_2]_{gs}^{[I_1 I_2]_{g's'}} - \omega_{2g'} [R_1 R_2]_{gs}^{[I_1 R_2]_{g's'}} \end{aligned} \right)
\end{aligned}$$

### Individuals who have $[R_1S_2]$ partners

$$\frac{d[S_1S_2]_{gs}^{[R_1S_2]_{g's'}}}{dt} = \left( \begin{aligned} & \left( -\mu - \left( \frac{\tau_{gs} + \tau_{g's'}}{2} \right) \right) [S_1S_2]_{gs}^{[R_1S_2]_{g's'}} - \mu [R_1S_2]_{g's'}^{[S_1S_2]_{gs}} + \nu_{gsg's'} \left( \frac{[R_1S_2]_{g's'}^0}{N_{g's'}^0} \right) [S_1S_2]_{gs}^0 \\ & + \gamma_{1g} (1 - \sigma_{1g}) [I_1S_2]_{gs}^{[R_1S_2]_{g's'}} + \gamma_{2g} (1 - \sigma_{2g}) [S_1I_2]_{gs}^{[R_1S_2]_{g's'}} + \omega_{1g} [R_1S_2]_{gs}^{[R_1S_2]_{g's'}} + \omega_{2g} [S_1R_2]_{gs}^{[R_1S_2]_{g's'}} \\ & + \gamma_{1g} \sigma_{1g'} [S_1S_2]_{gs}^{[I_1S_2]_{g's'}} + \gamma_{2g'} (1 - \sigma_{2g'}) [S_1S_2]_{gs}^{[R_1I_2]_{g's'}} - \omega_{1g'} [S_1S_2]_{gs}^{[R_1S_2]_{g's'}} + \omega_{2g'} [S_1S_2]_{gs}^{[R_1R_2]_{g's'}} \end{aligned} \right)$$

$$\frac{d[S_1I_2]_{gs}^{[R_1S_2]_{g's'}}}{dt} = \left( \begin{aligned} & \left( -\mu - \left( \frac{\tau_{gs} + \tau_{g's'}}{2} \right) \right) [S_1I_2]_{gs}^{[R_1S_2]_{g's'}} - \mu [R_1S_2]_{g's'}^{[S_1I_2]_{gs}} + \nu_{gsg's'} \left( \frac{[R_1S_2]_{g's'}^0}{N_{g's'}^0} \right) [S_1I_2]_{gs}^0 \\ & + \gamma_{1g} (1 - \sigma_{1g}) [I_1I_2]_{gs}^{[R_1S_2]_{g's'}} - \gamma_{2g} [S_1I_2]_{gs}^{[R_1S_2]_{g's'}} + \omega_{1g} [R_1I_2]_{gs}^{[R_1S_2]_{g's'}} \\ & + \gamma_{1g} \sigma_{1g'} [S_1I_2]_{gs}^{[I_1S_2]_{g's'}} + \gamma_{2g'} (1 - \sigma_{2g'}) [S_1I_2]_{gs}^{[R_1I_2]_{g's'}} - \omega_{1g'} [S_1I_2]_{gs}^{[R_1S_2]_{g's'}} + \omega_{2g'} [S_1I_2]_{gs}^{[R_1R_2]_{g's'}} - \lambda_{2g'} \phi_{2g'} [S_1I_2]_{gs}^{[R_1S_2]_{g's'}} \end{aligned} \right)$$

$$\frac{d[S_1R_2]_{gs}^{[R_1S_2]_{g's'}}}{dt} = \left( \begin{aligned} & \left( -\mu - \left( \frac{\tau_{gs} + \tau_{g's'}}{2} \right) \right) [S_1R_2]_{gs}^{[R_1S_2]_{g's'}} - \mu [R_1S_2]_{g's'}^{[S_1R_2]_{gs}} + \nu_{gsg's'} \left( \frac{[R_1S_2]_{g's'}^0}{N_{g's'}^0} \right) [S_1R_2]_{gs}^0 \\ & + \gamma_{1g} (1 - \sigma_{1g}) [I_1R_2]_{gs}^{[R_1S_2]_{g's'}} + \gamma_{2g} \sigma_{2g} [S_1I_2]_{gs}^{[R_1S_2]_{g's'}} + \omega_{1g} [R_1R_2]_{gs}^{[R_1S_2]_{g's'}} - \omega_{2g} [S_1R_2]_{gs}^{[R_1S_2]_{g's'}} \\ & + \gamma_{1g} \sigma_{1g'} [S_1R_2]_{gs}^{[I_1S_2]_{g's'}} + \gamma_{2g'} (1 - \sigma_{2g'}) [S_1R_2]_{gs}^{[R_1I_2]_{g's'}} - \omega_{1g'} [S_1R_2]_{gs}^{[R_1S_2]_{g's'}} + \omega_{2g'} [S_1R_2]_{gs}^{[R_1R_2]_{g's'}} \end{aligned} \right)$$



$$\begin{aligned}
\frac{d[I_1 S_2]_{gs}^{[R_1 S_2]_{g's'}}}{dt} &= \left( \begin{aligned} & -\mu - \left( \frac{\tau_{gs} + \tau_{g's'}}{2} \right) \left[ I_1 S_2 \right]_{gs}^{[R_1 S_2]_{g's'}} - \mu [R_1 S_2]_{g's'}^{[I_1 S_2]_{gs}} + \nu_{gs g's'} \left( \frac{[R_1 S_2]_{g's'}^0}{N_{g's'}^0} \right) [I_1 S_2]_{gs}^0 \\ & - \gamma_{1g} [I_1 S_2]_{gs}^{[R_1 S_2]_{g's'}} + \gamma_{2g} (1 - \sigma_{2g}) [I_1 I_2]_{gs}^{[R_1 S_2]_{g's'}} + \omega_{2g} [I_1 R_2]_{gs}^{[R_1 S_2]_{g's'}} \\ & + \gamma_{1g'} \sigma_{1g'} [I_1 S_2]_{gs}^{[I_1 S_2]_{g's'}} + \gamma_{2g'} (1 - \sigma_{2g'}) [I_1 S_2]_{gs}^{[R_1 I_2]_{g's'}} - \omega_{1g'} [I_1 S_2]_{gs}^{[R_1 S_2]_{g's'}} + \omega_{2g'} [I_1 S_2]_{gs}^{[R_1 R_2]_{g's'}} \end{aligned} \right) \\
\frac{d[I_1 I_2]_{gs}^{[R_1 S_2]_{g's'}}}{dt} &= \left( \begin{aligned} & -\mu - \left( \frac{\tau_{gs} + \tau_{g's'}}{2} \right) \left[ I_1 I_2 \right]_{gs}^{[R_1 S_2]_{g's'}} - \mu [R_1 S_2]_{g's'}^{[I_1 I_2]_{gs}} + \nu_{gs g's'} \left( \frac{[R_1 S_2]_{g's'}^0}{N_{g's'}^0} \right) [I_1 I_2]_{gs}^0 \\ & - \gamma_{1g} [I_1 I_2]_{gs}^{[R_1 S_2]_{g's'}} - \gamma_{2g} [I_1 I_2]_{gs}^{[R_1 S_2]_{g's'}} \\ & + \gamma_{1g'} \sigma_{1g'} [I_1 I_2]_{gs}^{[I_1 S_2]_{g's'}} + \gamma_{2g'} (1 - \sigma_{2g'}) [I_1 I_2]_{gs}^{[R_1 I_2]_{g's'}} - \omega_{1g'} [I_1 I_2]_{gs}^{[R_1 S_2]_{g's'}} + \omega_{2g'} [I_1 I_2]_{gs}^{[R_1 R_2]_{g's'}} - \lambda_{2g'} \phi_{2g'} [I_1 I_2]_{gs}^{[R_1 S_2]_{g's'}} \end{aligned} \right) \\
\frac{d[I_1 R_2]_{gs}^{[R_1 S_2]_{g's'}}}{dt} &= \left( \begin{aligned} & -\mu - \left( \frac{\tau_{gs} + \tau_{g's'}}{2} \right) \left[ I_1 R_2 \right]_{gs}^{[R_1 S_2]_{g's'}} - \mu [R_1 S_2]_{g's'}^{[I_1 R_2]_{gs}} + \nu_{gs g's'} \left( \frac{[R_1 S_2]_{g's'}^0}{N_{g's'}^0} \right) [I_1 R_2]_{gs}^0 \\ & - \gamma_{1g} [I_1 R_2]_{gs}^{[R_1 S_2]_{g's'}} + \gamma_{2g} \sigma_{2g} [I_1 I_2]_{gs}^{[R_1 S_2]_{g's'}} - \omega_{2g} [I_1 R_2]_{gs}^{[R_1 S_2]_{g's'}} \\ & + \gamma_{1g'} \sigma_{1g'} [I_1 R_2]_{gs}^{[I_1 S_2]_{g's'}} + \gamma_{2g'} (1 - \sigma_{2g'}) [I_1 R_2]_{gs}^{[R_1 I_2]_{g's'}} - \omega_{1g'} [I_1 R_2]_{gs}^{[R_1 S_2]_{g's'}} + \omega_{2g'} [I_1 R_2]_{gs}^{[R_1 R_2]_{g's'}} \end{aligned} \right) \\
\frac{d[R_1 S_2]_{gs}^{[R_1 S_2]_{g's'}}}{dt} &= \left( \begin{aligned} & -\mu - \left( \frac{\tau_{gs} + \tau_{g's'}}{2} \right) \left[ R_1 S_2 \right]_{gs}^{[R_1 S_2]_{g's'}} - \mu [R_1 S_2]_{g's'}^{[R_1 S_2]_{gs}} + \nu_{gs g's'} \left( \frac{[R_1 S_2]_{g's'}^0}{N_{g's'}^0} \right) [R_1 S_2]_{gs}^0 \\ & + \gamma_{1g} \sigma_{1g} [I_1 S_2]_{gs}^{[R_1 S_2]_{g's'}} + \gamma_{2g} (1 - \sigma_{2g}) [R_1 I_2]_{gs}^{[R_1 S_2]_{g's'}} - \omega_{1g} [R_1 S_2]_{gs}^{[R_1 S_2]_{g's'}} + \omega_{2g} [R_1 R_2]_{gs}^{[R_1 S_2]_{g's'}} \\ & + \gamma_{1g'} \sigma_{1g'} [R_1 S_2]_{gs}^{[I_1 S_2]_{g's'}} + \gamma_{2g'} (1 - \sigma_{2g'}) [R_1 S_2]_{gs}^{[R_1 I_2]_{g's'}} - \omega_{1g'} [R_1 S_2]_{gs}^{[R_1 S_2]_{g's'}} + \omega_{2g'} [R_1 S_2]_{gs}^{[R_1 R_2]_{g's'}} \end{aligned} \right) \\
\frac{d[R_1 I_2]_{gs}^{[R_1 S_2]_{g's'}}}{dt} &= \left( \begin{aligned} & -\mu - \left( \frac{\tau_{gs} + \tau_{g's'}}{2} \right) \left[ R_1 I_2 \right]_{gs}^{[R_1 S_2]_{g's'}} - \mu [R_1 S_2]_{g's'}^{[R_1 I_2]_{gs}} + \nu_{gs g's'} \left( \frac{[R_1 S_2]_{g's'}^0}{N_{g's'}^0} \right) [R_1 I_2]_{gs}^0 \\ & + \gamma_{1g} \sigma_{1g} [I_1 I_2]_{gs}^{[R_1 S_2]_{g's'}} - \gamma_{2g} [R_1 I_2]_{gs}^{[R_1 S_2]_{g's'}} - \omega_{1g} [R_1 I_2]_{gs}^{[R_1 S_2]_{g's'}} \\ & + \gamma_{1g'} \sigma_{1g'} [R_1 I_2]_{gs}^{[I_1 S_2]_{g's'}} + \gamma_{2g'} (1 - \sigma_{2g'}) [R_1 I_2]_{gs}^{[R_1 I_2]_{g's'}} - \omega_{1g'} [R_1 I_2]_{gs}^{[R_1 S_2]_{g's'}} + \omega_{2g'} [R_1 I_2]_{gs}^{[R_1 R_2]_{g's'}} - \lambda_{2g'} \phi_{2g'} [R_1 I_2]_{gs}^{[R_1 S_2]_{g's'}} \end{aligned} \right) \\
\frac{d[R_1 R_2]_{gs}^{[R_1 S_2]_{g's'}}}{dt} &= \left( \begin{aligned} & -\mu - \left( \frac{\tau_{gs} + \tau_{g's'}}{2} \right) \left[ R_1 R_2 \right]_{gs}^{[R_1 S_2]_{g's'}} - \mu [R_1 S_2]_{g's'}^{[R_1 R_2]_{gs}} + \nu_{gs g's'} \left( \frac{[R_1 S_2]_{g's'}^0}{N_{g's'}^0} \right) [R_1 R_2]_{gs}^0 \\ & + \gamma_{1g} \sigma_{1g} [I_1 R_2]_{gs}^{[R_1 S_2]_{g's'}} + \gamma_{2g} \sigma_{2g} [R_1 I_2]_{gs}^{[R_1 S_2]_{g's'}} - \omega_{1g} [R_1 R_2]_{gs}^{[R_1 S_2]_{g's'}} - \omega_{2g} [R_1 R_2]_{gs}^{[R_1 S_2]_{g's'}} \\ & + \gamma_{1g'} \sigma_{1g'} [R_1 R_2]_{gs}^{[I_1 S_2]_{g's'}} + \gamma_{2g'} (1 - \sigma_{2g'}) [R_1 R_2]_{gs}^{[R_1 I_2]_{g's'}} - \omega_{1g'} [R_1 R_2]_{gs}^{[R_1 S_2]_{g's'}} + \omega_{2g'} [R_1 R_2]_{gs}^{[R_1 R_2]_{g's'}} \end{aligned} \right)
\end{aligned}$$

### Individuals who have $[R_1 I_2]$ partners

$$\frac{d[S_1 S_2]_{gs}^{[R_1 I_2]_{g's'}}}{dt} = \left( \begin{aligned} & \left( -\mu - \left( \frac{\tau_{gs} + \tau_{g's'}}{2} \right) \right) [S_1 S_2]_{gs}^{[R_1 I_2]_{g's'}} - \mu [R_1 I_2]_{g's'}^{[S_1 S_2]_{gs}} + \nu_{gsg's'} \left( \frac{[R_1 I_2]_{g's'}^0}{N_{g's'}^0} \right) [S_1 S_2]_{gs}^0 \\ & + \gamma_{1g} (1 - \sigma_{1g}) [I_1 S_2]_{gs}^{[R_1 I_2]_{g's'}} + \gamma_{2g} (1 - \sigma_{2g}) [S_1 I_2]_{gs}^{[R_1 I_2]_{g's'}} + \omega_{1g} [R_1 S_2]_{gs}^{[R_1 I_2]_{g's'}} + \omega_{2g} [S_1 R_2]_{gs}^{[R_1 I_2]_{g's'}} - \lambda_{2g} [S_1 S_2]_{gs}^{[R_1 I_2]_{g's'}} \\ & + \gamma_{1g'} \sigma_{1g'} [S_1 S_2]_{gs}^{[I_1 I_2]_{g's'}} - \gamma_{2g'} [S_1 S_2]_{gs}^{[R_1 I_2]_{g's'}} - \omega_{1g'} [S_1 S_2]_{gs}^{[R_1 I_2]_{g's'}} \end{aligned} \right)$$

$$\frac{d[S_1 I_2]_{gs}^{[R_1 I_2]_{g's'}}}{dt} = \left( \begin{aligned} & \left( -\mu - \left( \frac{\tau_{gs} + \tau_{g's'}}{2} \right) \right) [S_1 I_2]_{gs}^{[R_1 I_2]_{g's'}} - \mu [R_1 I_2]_{g's'}^{[S_1 I_2]_{gs}} + \nu_{gsg's'} \left( \frac{[R_1 I_2]_{g's'}^0}{N_{g's'}^0} \right) [S_1 I_2]_{gs}^0 \\ & + \gamma_{1g} (1 - \sigma_{1g}) [I_1 I_2]_{gs}^{[R_1 I_2]_{g's'}} - \gamma_{2g} [S_1 I_2]_{gs}^{[R_1 I_2]_{g's'}} + \omega_{1g} [R_1 I_2]_{gs}^{[R_1 I_2]_{g's'}} + \lambda_{2g} [S_1 S_2]_{gs}^{[R_1 I_2]_{g's'}} \\ & + \gamma_{1g'} \sigma_{1g'} [S_1 I_2]_{gs}^{[I_1 I_2]_{g's'}} - \gamma_{2g'} [S_1 I_2]_{gs}^{[R_1 I_2]_{g's'}} - \omega_{1g'} [S_1 I_2]_{gs}^{[R_1 I_2]_{g's'}} + \lambda_{2g'} \phi_{2g'} [S_1 I_2]_{gs}^{[R_1 S_2]_{g's'}} \end{aligned} \right)$$

$$\frac{d[S_1 R_2]_{gs}^{[R_1 I_2]_{g's'}}}{dt} = \left( \begin{aligned} & \left( -\mu - \left( \frac{\tau_{gs} + \tau_{g's'}}{2} \right) \right) [S_1 R_2]_{gs}^{[R_1 I_2]_{g's'}} - \mu [R_1 I_2]_{g's'}^{[S_1 R_2]_{gs}} + \nu_{gsg's'} \left( \frac{[R_1 I_2]_{g's'}^0}{N_{g's'}^0} \right) [S_1 R_2]_{gs}^0 \\ & + \gamma_{1g} (1 - \sigma_{1g}) [I_1 R_2]_{gs}^{[R_1 I_2]_{g's'}} + \gamma_{2g} \sigma_{2g} [S_1 I_2]_{gs}^{[R_1 I_2]_{g's'}} + \omega_{1g} [R_1 R_2]_{gs}^{[R_1 I_2]_{g's'}} - \omega_{2g} [S_1 R_2]_{gs}^{[R_1 I_2]_{g's'}} \\ & + \gamma_{1g'} \sigma_{1g'} [S_1 R_2]_{gs}^{[I_1 I_2]_{g's'}} - \gamma_{2g'} [S_1 R_2]_{gs}^{[R_1 I_2]_{g's'}} - \omega_{1g'} [S_1 R_2]_{gs}^{[R_1 I_2]_{g's'}} \end{aligned} \right)$$

$$\begin{aligned}
\frac{d[I_1 S_2]_{gs}^{[R_1 I_2]_{g's'}}}{dt} &= \left( \begin{aligned} & \left( -\mu - \left( \frac{\tau_{gs} + \tau_{g's'}}{2} \right) \right) [I_1 S_2]_{gs}^{[R_1 I_2]_{g's'}} - \mu [R_1 I_2]_{g's'}^{[I_1 S_2]_{gs}} + \nu_{gsg's'} \left( \frac{[R_1 I_2]_{g's'}^0}{N_{g's'}^0} \right) [I_1 S_2]_{gs}^0 \\ & - \gamma_{1g} [I_1 S_2]_{gs}^{[R_1 I_2]_{g's'}} + \gamma_{2g} (1 - \sigma_{2g}) [I_1 I_2]_{gs}^{[R_1 I_2]_{g's'}} + \omega_{2g} [I_1 R_2]_{gs}^{[R_1 I_2]_{g's'}} - \lambda_{2g} \chi_{2g} [I_1 S_2]_{gs}^{[R_1 I_2]_{g's'}} \\ & + \gamma_{1g} \sigma_{1g'} [I_1 S_2]_{gs}^{[I_1 I_2]_{g's'}} - \gamma_{2g'} [I_1 S_2]_{gs}^{[R_1 I_2]_{g's'}} - \omega_{1g'} [I_1 S_2]_{gs}^{[R_1 I_2]_{g's'}} \end{aligned} \right) \\
\frac{d[I_1 I_2]_{gs}^{[R_1 I_2]_{g's'}}}{dt} &= \left( \begin{aligned} & \left( -\mu - \left( \frac{\tau_{gs} + \tau_{g's'}}{2} \right) \right) [I_1 I_2]_{gs}^{[R_1 I_2]_{g's'}} - \mu [R_1 I_2]_{g's'}^{[I_1 I_2]_{gs}} + \nu_{gsg's'} \left( \frac{[R_1 I_2]_{g's'}^0}{N_{g's'}^0} \right) [I_1 I_2]_{gs}^0 \\ & - \gamma_{1g} [I_1 I_2]_{gs}^{[R_1 I_2]_{g's'}} - \gamma_{2g} [I_1 I_2]_{gs}^{[R_1 I_2]_{g's'}} + \lambda_{2g} \chi_{2g} [I_1 S_2]_{gs}^{[R_1 I_2]_{g's'}} \\ & + \gamma_{1g} \sigma_{1g'} [I_1 I_2]_{gs}^{[I_1 I_2]_{g's'}} - \gamma_{2g'} [I_1 I_2]_{gs}^{[R_1 I_2]_{g's'}} - \omega_{1g'} [I_1 I_2]_{gs}^{[R_1 I_2]_{g's'}} + \lambda_{2g} \phi_{2g'} [I_1 I_2]_{gs}^{[R_1 S_2]_{g's'}} \end{aligned} \right) \\
\frac{d[I_1 R_2]_{gs}^{[R_1 I_2]_{g's'}}}{dt} &= \left( \begin{aligned} & \left( -\mu - \left( \frac{\tau_{gs} + \tau_{g's'}}{2} \right) \right) [I_1 R_2]_{gs}^{[R_1 I_2]_{g's'}} - \mu [R_1 I_2]_{g's'}^{[I_1 R_2]_{gs}} + \nu_{gsg's'} \left( \frac{[R_1 I_2]_{g's'}^0}{N_{g's'}^0} \right) [I_1 R_2]_{gs}^0 \\ & - \gamma_{1g} [I_1 R_2]_{gs}^{[R_1 I_2]_{g's'}} + \gamma_{2g} \sigma_{2g} [I_1 I_2]_{gs}^{[R_1 I_2]_{g's'}} - \omega_{2g} [I_1 R_2]_{gs}^{[R_1 I_2]_{g's'}} \\ & + \gamma_{1g} \sigma_{1g'} [I_1 R_2]_{gs}^{[I_1 I_2]_{g's'}} - \gamma_{2g'} [I_1 R_2]_{gs}^{[R_1 I_2]_{g's'}} - \omega_{1g'} [I_1 R_2]_{gs}^{[R_1 I_2]_{g's'}} \end{aligned} \right) \\
\frac{d[R_1 S_2]_{gs}^{[R_1 I_2]_{g's'}}}{dt} &= \left( \begin{aligned} & \left( -\mu - \left( \frac{\tau_{gs} + \tau_{g's'}}{2} \right) \right) [R_1 S_2]_{gs}^{[R_1 I_2]_{g's'}} - \mu [R_1 I_2]_{g's'}^{[R_1 S_2]_{gs}} + \nu_{gsg's'} \left( \frac{[R_1 I_2]_{g's'}^0}{N_{g's'}^0} \right) [R_1 S_2]_{gs}^0 \\ & + \gamma_{1g} \sigma_{1g'} [I_1 S_2]_{gs}^{[R_1 I_2]_{g's'}} + \gamma_{2g} (1 - \sigma_{2g}) [R_1 I_2]_{gs}^{[R_1 I_2]_{g's'}} - \omega_{1g} [R_1 S_2]_{gs}^{[R_1 I_2]_{g's'}} + \omega_{2g} [R_1 R_2]_{gs}^{[R_1 I_2]_{g's'}} - \lambda_{2g} \phi_{2g} [R_1 S_2]_{gs}^{[R_1 I_2]_{g's'}} \\ & + \gamma_{1g} \sigma_{1g'} [R_1 S_2]_{gs}^{[I_1 I_2]_{g's'}} - \gamma_{2g'} [R_1 S_2]_{gs}^{[R_1 I_2]_{g's'}} - \omega_{1g'} [R_1 S_2]_{gs}^{[R_1 I_2]_{g's'}} \end{aligned} \right) \\
\frac{d[R_1 I_2]_{gs}^{[R_1 I_2]_{g's'}}}{dt} &= \left( \begin{aligned} & \left( -\mu - \left( \frac{\tau_{gs} + \tau_{g's'}}{2} \right) \right) [R_1 I_2]_{gs}^{[R_1 I_2]_{g's'}} - \mu [R_1 I_2]_{g's'}^{[R_1 I_2]_{gs}} + \nu_{gsg's'} \left( \frac{[R_1 I_2]_{g's'}^0}{N_{g's'}^0} \right) [R_1 I_2]_{gs}^0 \\ & + \gamma_{1g} \sigma_{1g'} [I_1 I_2]_{gs}^{[R_1 I_2]_{g's'}} - \gamma_{2g} [R_1 I_2]_{gs}^{[R_1 I_2]_{g's'}} - \omega_{1g} [R_1 I_2]_{gs}^{[R_1 I_2]_{g's'}} + \lambda_{2g} \phi_{2g} [R_1 S_2]_{gs}^{[R_1 I_2]_{g's'}} \\ & + \gamma_{1g} \sigma_{1g'} [R_1 I_2]_{gs}^{[I_1 I_2]_{g's'}} - \gamma_{2g'} [R_1 I_2]_{gs}^{[R_1 I_2]_{g's'}} - \omega_{1g'} [R_1 I_2]_{gs}^{[R_1 I_2]_{g's'}} + \lambda_{2g} \phi_{2g'} [R_1 I_2]_{gs}^{[R_1 S_2]_{g's'}} \end{aligned} \right) \\
\frac{d[R_1 R_2]_{gs}^{[R_1 I_2]_{g's'}}}{dt} &= \left( \begin{aligned} & \left( -\mu - \left( \frac{\tau_{gs} + \tau_{g's'}}{2} \right) \right) [R_1 R_2]_{gs}^{[R_1 I_2]_{g's'}} - \mu [R_1 I_2]_{g's'}^{[R_1 R_2]_{gs}} + \nu_{gsg's'} \left( \frac{[R_1 I_2]_{g's'}^0}{N_{g's'}^0} \right) [R_1 R_2]_{gs}^0 \\ & + \gamma_{1g} \sigma_{1g'} [I_1 R_2]_{gs}^{[R_1 I_2]_{g's'}} + \gamma_{2g} \sigma_{2g} [R_1 I_2]_{gs}^{[R_1 I_2]_{g's'}} - \omega_{1g} [R_1 R_2]_{gs}^{[R_1 I_2]_{g's'}} - \omega_{2g} [R_1 R_2]_{gs}^{[R_1 I_2]_{g's'}} \\ & + \gamma_{1g} \sigma_{1g'} [R_1 R_2]_{gs}^{[I_1 I_2]_{g's'}} - \gamma_{2g'} [R_1 R_2]_{gs}^{[R_1 I_2]_{g's'}} - \omega_{1g'} [R_1 R_2]_{gs}^{[R_1 I_2]_{g's'}} \end{aligned} \right)
\end{aligned}$$

**Individuals who have  $[R_1R_2]$  partners**

$$\begin{aligned}
 \frac{d[S_1S_2]_{gs}^{[R_1R_2]_{g's'}}}{dt} &= \left( \begin{aligned} &\left( -\mu - \left( \frac{\tau_{gs} + \tau_{g's'}}{2} \right) \right) [S_1S_2]_{gs}^{[R_1R_2]_{g's'}} - \mu [R_1R_2]_{g's'}^{[S_1S_2]_{gs}} + \nu_{gs g's'} \left( \frac{[R_1R_2]_{g's'}^0}{N_{g's'}^0} \right) [S_1S_2]_{gs}^0 \\ &+ \gamma_{1g} (1 - \sigma_{1g}) [I_1S_2]_{gs}^{[R_1R_2]_{g's'}} + \gamma_{2g} (1 - \sigma_{2g}) [S_1I_2]_{gs}^{[R_1R_2]_{g's'}} + \omega_{1g} [R_1S_2]_{gs}^{[R_1R_2]_{g's'}} + \omega_{2g} [S_1R_2]_{gs}^{[R_1R_2]_{g's'}} \\ &+ \gamma_{1g} \sigma_{1g} [S_1S_2]_{gs}^{[I_1R_2]_{g's'}} + \gamma_{2g} \sigma_{2g} [S_1S_2]_{gs}^{[R_1I_2]_{g's'}} - \omega_{1g} [S_1S_2]_{gs}^{[R_1R_2]_{g's'}} - \omega_{2g} [S_1S_2]_{gs}^{[R_1R_2]_{g's'}} \end{aligned} \right) \\
 \frac{d[S_1I_2]_{gs}^{[R_1R_2]_{g's'}}}{dt} &= \left( \begin{aligned} &\left( -\mu - \left( \frac{\tau_{gs} + \tau_{g's'}}{2} \right) \right) [S_1I_2]_{gs}^{[R_1R_2]_{g's'}} - \mu [R_1R_2]_{g's'}^{[S_1I_2]_{gs}} + \nu_{gs g's'} \left( \frac{[R_1R_2]_{g's'}^0}{N_{g's'}^0} \right) [S_1I_2]_{gs}^0 \\ &+ \gamma_{1g} (1 - \sigma_{1g}) [I_1I_2]_{gs}^{[R_1R_2]_{g's'}} - \gamma_{2g} [S_1I_2]_{gs}^{[R_1R_2]_{g's'}} + \omega_{1g} [R_1I_2]_{gs}^{[R_1R_2]_{g's'}} \\ &+ \gamma_{1g} \sigma_{1g} [S_1I_2]_{gs}^{[I_1R_2]_{g's'}} + \gamma_{2g} \sigma_{2g} [S_1I_2]_{gs}^{[R_1I_2]_{g's'}} - \omega_{1g} [S_1I_2]_{gs}^{[R_1R_2]_{g's'}} - \omega_{2g} [S_1I_2]_{gs}^{[R_1R_2]_{g's'}} \end{aligned} \right) \\
 \frac{d[S_1R_2]_{gs}^{[R_1R_2]_{g's'}}}{dt} &= \left( \begin{aligned} &\left( -\mu - \left( \frac{\tau_{gs} + \tau_{g's'}}{2} \right) \right) [S_1R_2]_{gs}^{[R_1R_2]_{g's'}} - \mu [R_1R_2]_{g's'}^{[S_1R_2]_{gs}} + \nu_{gs g's'} \left( \frac{[R_1R_2]_{g's'}^0}{N_{g's'}^0} \right) [S_1R_2]_{gs}^0 \\ &+ \gamma_{1g} (1 - \sigma_{1g}) [I_1R_2]_{gs}^{[R_1R_2]_{g's'}} + \gamma_{2g} \sigma_{2g} [S_1I_2]_{gs}^{[R_1R_2]_{g's'}} + \omega_{1g} [R_1R_2]_{gs}^{[R_1R_2]_{g's'}} - \omega_{2g} [S_1R_2]_{gs}^{[R_1R_2]_{g's'}} \\ &+ \gamma_{1g} \sigma_{1g} [S_1R_2]_{gs}^{[I_1R_2]_{g's'}} + \gamma_{2g} \sigma_{2g} [S_1R_2]_{gs}^{[R_1I_2]_{g's'}} - \omega_{1g} [S_1R_2]_{gs}^{[R_1R_2]_{g's'}} - \omega_{2g} [S_1R_2]_{gs}^{[R_1R_2]_{g's'}} \end{aligned} \right)
 \end{aligned}$$

$$\begin{aligned}
\frac{d[I_1 S_2]_{gs}^{[R_1 R_2]_{g's'}}}{dt} &= \left( \begin{aligned} & \left( -\mu - \left( \frac{\tau_{gs} + \tau_{g's'}}{2} \right) \right) [I_1 S_2]_{gs}^{[R_1 R_2]_{g's'}} - \mu [R_1 R_2]_{g's'}^{[I_1 S_2]_{gs}} + \nu_{gsg's'} \left( \frac{[R_1 R_2]_{g's'}^0}{N_{g's'}^0} \right) [I_1 S_2]_{gs}^0 \\ & - \gamma_{1g} [I_1 S_2]_{gs}^{[R_1 R_2]_{g's'}} + \gamma_{2g} (1 - \sigma_{2g}) [I_1 I_2]_{gs}^{[R_1 R_2]_{g's'}} + \omega_{2g} [I_1 R_2]_{gs}^{[R_1 R_2]_{g's'}} \\ & + \gamma_{1g'} \sigma_{1g'} [I_1 S_2]_{gs}^{[I_1 R_2]_{g's'}} + \gamma_{2g'} \sigma_{2g'} [I_1 S_2]_{gs}^{[R_1 I_2]_{g's'}} - \omega_{1g'} [I_1 S_2]_{gs}^{[R_1 R_2]_{g's'}} - \omega_{2g'} [I_1 S_2]_{gs}^{[R_1 R_2]_{g's'}} \end{aligned} \right) \\
\frac{d[I_1 I_2]_{gs}^{[R_1 R_2]_{g's'}}}{dt} &= \left( \begin{aligned} & \left( -\mu - \left( \frac{\tau_{gs} + \tau_{g's'}}{2} \right) \right) [I_1 I_2]_{gs}^{[R_1 R_2]_{g's'}} - \mu [R_1 R_2]_{g's'}^{[I_1 I_2]_{gs}} + \nu_{gsg's'} \left( \frac{[R_1 R_2]_{g's'}^0}{N_{g's'}^0} \right) [I_1 I_2]_{gs}^0 \\ & - \gamma_{1g} [I_1 I_2]_{gs}^{[R_1 R_2]_{g's'}} - \gamma_{2g} [I_1 I_2]_{gs}^{[R_1 R_2]_{g's'}} \\ & + \gamma_{1g'} \sigma_{1g'} [I_1 I_2]_{gs}^{[I_1 R_2]_{g's'}} + \gamma_{2g'} \sigma_{2g'} [I_1 I_2]_{gs}^{[R_1 I_2]_{g's'}} - \omega_{1g'} [I_1 I_2]_{gs}^{[R_1 R_2]_{g's'}} - \omega_{2g'} [I_1 I_2]_{gs}^{[R_1 R_2]_{g's'}} \end{aligned} \right) \\
\frac{d[I_1 R_2]_{gs}^{[R_1 R_2]_{g's'}}}{dt} &= \left( \begin{aligned} & \left( -\mu - \left( \frac{\tau_{gs} + \tau_{g's'}}{2} \right) \right) [I_1 R_2]_{gs}^{[R_1 R_2]_{g's'}} - \mu [R_1 R_2]_{g's'}^{[I_1 R_2]_{gs}} + \nu_{gsg's'} \left( \frac{[R_1 R_2]_{g's'}^0}{N_{g's'}^0} \right) [I_1 R_2]_{gs}^0 \\ & - \gamma_{1g} [I_1 R_2]_{gs}^{[R_1 R_2]_{g's'}} + \gamma_{2g} \sigma_{2g} [I_1 I_2]_{gs}^{[R_1 R_2]_{g's'}} - \omega_{2g} [I_1 R_2]_{gs}^{[R_1 R_2]_{g's'}} \\ & + \gamma_{1g'} \sigma_{1g'} [I_1 R_2]_{gs}^{[I_1 R_2]_{g's'}} + \gamma_{2g'} \sigma_{2g'} [I_1 R_2]_{gs}^{[R_1 I_2]_{g's'}} - \omega_{1g'} [I_1 R_2]_{gs}^{[R_1 R_2]_{g's'}} - \omega_{2g'} [I_1 R_2]_{gs}^{[R_1 R_2]_{g's'}} \end{aligned} \right) \\
\frac{d[R_1 S_2]_{gs}^{[R_1 R_2]_{g's'}}}{dt} &= \left( \begin{aligned} & \left( -\mu - \left( \frac{\tau_{gs} + \tau_{g's'}}{2} \right) \right) [R_1 S_2]_{gs}^{[R_1 R_2]_{g's'}} - \mu [R_1 R_2]_{g's'}^{[R_1 S_2]_{gs}} + \nu_{gsg's'} \left( \frac{[R_1 R_2]_{g's'}^0}{N_{g's'}^0} \right) [R_1 S_2]_{gs}^0 \\ & + \gamma_{1g} \sigma_{1g} [I_1 S_2]_{gs}^{[R_1 R_2]_{g's'}} + \gamma_{2g} (1 - \sigma_{2g}) [R_1 I_2]_{gs}^{[R_1 R_2]_{g's'}} - \omega_{1g} [R_1 S_2]_{gs}^{[R_1 R_2]_{g's'}} + \omega_{2g} [R_1 R_2]_{gs}^{[R_1 R_2]_{g's'}} \\ & + \gamma_{1g'} \sigma_{1g'} [R_1 S_2]_{gs}^{[I_1 R_2]_{g's'}} + \gamma_{2g'} \sigma_{2g'} [R_1 S_2]_{gs}^{[R_1 I_2]_{g's'}} - \omega_{1g'} [R_1 S_2]_{gs}^{[R_1 R_2]_{g's'}} - \omega_{2g'} [R_1 S_2]_{gs}^{[R_1 R_2]_{g's'}} \end{aligned} \right) \\
\frac{d[R_1 I_2]_{gs}^{[R_1 R_2]_{g's'}}}{dt} &= \left( \begin{aligned} & \left( -\mu - \left( \frac{\tau_{gs} + \tau_{g's'}}{2} \right) \right) [R_1 I_2]_{gs}^{[R_1 R_2]_{g's'}} - \mu [R_1 R_2]_{g's'}^{[R_1 I_2]_{gs}} + \nu_{gsg's'} \left( \frac{[R_1 R_2]_{g's'}^0}{N_{g's'}^0} \right) [R_1 I_2]_{gs}^0 \\ & + \gamma_{1g} \sigma_{1g} [I_1 I_2]_{gs}^{[R_1 R_2]_{g's'}} - \gamma_{2g} [R_1 I_2]_{gs}^{[R_1 R_2]_{g's'}} - \omega_{1g} [R_1 I_2]_{gs}^{[R_1 R_2]_{g's'}} \\ & + \gamma_{1g'} \sigma_{1g'} [R_1 I_2]_{gs}^{[I_1 R_2]_{g's'}} + \gamma_{2g'} \sigma_{2g'} [R_1 I_2]_{gs}^{[R_1 I_2]_{g's'}} - \omega_{1g'} [R_1 I_2]_{gs}^{[R_1 R_2]_{g's'}} - \omega_{2g'} [R_1 I_2]_{gs}^{[R_1 R_2]_{g's'}} \end{aligned} \right) \\
\frac{d[R_1 R_2]_{gs}^{[R_1 R_2]_{g's'}}}{dt} &= \left( \begin{aligned} & \left( -\mu - \left( \frac{\tau_{gs} + \tau_{g's'}}{2} \right) \right) [R_1 R_2]_{gs}^{[R_1 R_2]_{g's'}} - \mu [R_1 R_2]_{g's'}^{[R_1 R_2]_{gs}} + \nu_{gsg's'} \left( \frac{[R_1 R_2]_{g's'}^0}{N_{g's'}^0} \right) [R_1 R_2]_{gs}^0 \\ & + \gamma_{1g} \sigma_{1g} [I_1 R_2]_{gs}^{[R_1 R_2]_{g's'}} + \gamma_{2g} \sigma_{2g} [R_1 I_2]_{gs}^{[R_1 R_2]_{g's'}} - \omega_{1g} [R_1 R_2]_{gs}^{[R_1 R_2]_{g's'}} - \omega_{2g} [R_1 R_2]_{gs}^{[R_1 R_2]_{g's'}} \\ & + \gamma_{1g'} \sigma_{1g'} [R_1 R_2]_{gs}^{[I_1 R_2]_{g's'}} + \gamma_{2g'} \sigma_{2g'} [R_1 R_2]_{gs}^{[R_1 I_2]_{g's'}} - \omega_{1g'} [R_1 R_2]_{gs}^{[R_1 R_2]_{g's'}} - \omega_{2g'} [R_1 R_2]_{gs}^{[R_1 R_2]_{g's'}} \end{aligned} \right)
\end{aligned}$$

## Equations for the rates of infection and partnering

$$\lambda_{1g} = \pi\delta_{1g}$$

$$\lambda_{2g} = \pi\delta_{2g}$$

$$\lambda_{12g} = \pi\delta_{1g}\delta_{2g}$$

$$\lambda_{1g2g'} = \pi\delta_{1g}\delta_{2g'}$$

$$\lambda_{1g'2g} = \pi\delta_{1g'}\delta_{2g}$$

If  $s = s'$ :

$$\rho_{gs'g's'} = \varepsilon + (1-\varepsilon)(v_{g's'} \times N_{g's'}^0) / \sum_{s'} (v_{g's'} \times N_{g's'}^0)$$

If  $s \neq s'$ :

$$\rho_{gs'g's'} = (1-\varepsilon)(v_{g's'} \times N_{g's'}^0) / \sum_{s'} (v_{g's'} \times N_{g's'}^0)$$

$$v_{gs} = \left( \frac{c_{gs}}{1-\zeta} \right)$$

$$\tau_{gs} = \left( \frac{c_{gs}}{\zeta} \right)$$

$$v_{g=W,s,g'=M,s'} = v_{g=W,s} \times \rho_{g=W,s,g'=M,s'} \times \left( \frac{v_{g=W,s'} \times \rho_{g=W,s,g'=M,s'} \times N_{g=W,s}}{v_{g'=M,s'} \times \rho_{g'=M,s',g=W,s} \times N_{g'=M,s'}} \right)^{-(1-\zeta)}$$

$$v_{g=M,s,g'=W,s'} = v_{g=M,s} \times \rho_{g=M,s,g'=W,s'} \times \left( \frac{v_{g'=W,s'} \times \rho_{g'=W,s',g=M,s} \times N_{g'=W,s'}}{v_{g=M,s} \times \rho_{g=M,s,g'=W,s'} \times N_{g=M,s}} \right)^{\zeta}$$

## Calculation of epidemiologic measures of association between HPV types (interaction estimates)

We assumed HPV types interact in our model by having causal effects on the probability of being infected with the other HPV type per-sex-act with an infected partner. These causal effects are estimated using measures of association in epidemiologic studies. Our relative measures of association use health states with HPV type 1 as the exposure and infection with HPV type 2 as the outcome. We present the calculation of both crude measures of association and of measures of association adjusted for sexual activity level ( $adj(s)$ ).

## Cross-sectional measures of association

### Prevalence Odds Ratio (OR)

The OR is frequently used in cross-sectional studies of infection prevalence (11-15). The OR compares the odds of HPV type 2 prevalent infection in individuals infected with HPV type 1 relative to the odds of HPV type 2 prevalent infection in individuals uninfected with HPV type 1. ORs can be adjusted for potential confounders using multivariate logistic regression models or using Mantel-Haenszel estimators (shown below) which are a weighted average of stratum-specific estimates. The interaction effects  $\chi_{ig}$  and  $\varphi_{ig}$  do not directly intervene in the calculation of the OR, but influence its value by affecting the relative distribution of  $[S_1I_2]$ ,  $[I_1I_2]$ , and  $[R_1I_2]$ .

$$OR = \frac{\text{Odds of HPV type 2 prevalent infection in individuals infected with HPV type 1}}{\text{Odds of HPV type 2 prevalent infection in individuals uninfected with HPV type 1}}$$

$$OR = \frac{\left( \sum_{g,s} \left( [I_1I_2]_{gs}^0 + \sum_{s'} [I_1I_2]_{gs}^{N_{gs}^{s'}} \right) \right) / \sum_{g,s} \left( [I_1S_2]_{gs}^0 + [I_1R_2]_{gs}^0 + \sum_{s'} \left( [I_1S_2]_{gs}^{N_{gs}^{s'}} + [I_1R_2]_{gs}^{N_{gs}^{s'}} \right) \right)}{\left( \sum_{g,s} \left( [S_1I_2]_{gs}^0 + [R_1I_2]_{gs}^0 + \sum_{s'} \left( [S_1I_2]_{gs}^{N_{gs}^{s'}} + [R_1I_2]_{gs}^{N_{gs}^{s'}} \right) \right) \right) / \sum_{g,s} \left( [S_1S_2]_{gs}^0 + [S_1R_2]_{gs}^0 + [R_1S_2]_{gs}^0 + [R_1R_2]_{gs}^0 + \sum_{s'} \left( [S_1S_2]_{gs}^{N_{gs}^{s'}} + [S_1R_2]_{gs}^{N_{gs}^{s'}} + [R_1S_2]_{gs}^{N_{gs}^{s'}} + [R_1R_2]_{gs}^{N_{gs}^{s'}} \right) \right)}$$

$$OR_{adj(s)} = \frac{\sum_s \left( \frac{\sum_g \left( [I_1I_2]_{gs}^0 + \sum_{s'} [I_1I_2]_{gs}^{N_{gs}^{s'}} \right) \times \sum_g \left( [S_1S_2]_{gs}^0 + [S_1R_2]_{gs}^0 + [R_1S_2]_{gs}^0 + [R_1R_2]_{gs}^0 + \sum_{s'} \left( [S_1S_2]_{gs}^{N_{gs}^{s'}} + [S_1R_2]_{gs}^{N_{gs}^{s'}} + [R_1S_2]_{gs}^{N_{gs}^{s'}} + [R_1R_2]_{gs}^{N_{gs}^{s'}} \right) \right)}{\sum_g \left( N_{gs}^0 + \sum_{s'} N_{gs}^{N_{gs}^{s'}} \right)} \right)}{\sum_s \left( \frac{\sum_g \left( [S_1I_2]_{gs}^0 + [R_1I_2]_{gs}^0 + \sum_{s'} \left( [S_1I_2]_{gs}^{N_{gs}^{s'}} + [R_1I_2]_{gs}^{N_{gs}^{s'}} \right) \right) \times \sum_g \left( [I_1S_2]_{gs}^0 + [I_1R_2]_{gs}^0 + \sum_{s'} \left( [I_1S_2]_{gs}^{N_{gs}^{s'}} + [I_1R_2]_{gs}^{N_{gs}^{s'}} \right) \right)}{\sum_g \left( N_{gs}^0 + \sum_{s'} N_{gs}^{N_{gs}^{s'}} \right)} \right)}$$

## Prospective measures of association

We use the incidence rate ratio as our prospective measure of association between HPV types. We assumed that follow-up is restricted to individuals who are susceptible to HPV type 2 ( $[S_1S_2], [I_1S_2], [R_1S_2]$ ). This was done to remove the bias caused by immortal person-time from type-2 immune individuals (3) in order to isolate the bias due to correlation between times-at-risk for infection. In practice this may be hard to achieve as studies cannot generally determine which individuals are susceptible to HPV infection.

### Incidence rate ratio (IRR) by infection status

Some studies evaluate prevalent infection with a first HPV (type 1) as the exposure and incident infection with the second HPV (type 2) as the outcome (14, 16-21). The IRR by infection status compares the incidence rate of HPV type 2 in individuals infected with HPV type 1 relative to the

incidence rate of HPV type 2 in individuals uninfected with HPV type 1. We adjusted the IRR for the sexual activity level using Mantel-Haenszel estimators. Both interaction effects  $\chi_{2g}$  and  $\varphi_{2g}$  affect the calculation of the IRR by infection status. This can be seen in the equations for the instantaneous partnership model in sections below: the IRR by infection status will only be equal to the interaction effect  $\chi_{2g}$  caused by current infection when there is no cross-immune interaction ( $\varphi_{2g}=1$ ) or alternatively when individuals immune to the HPV type 1 ( $[R_1S_2]$ ) are excluded from calculations if  $\varphi_{2g} \neq 1$ . Cross-immune interactions ( $\varphi_{2g} < 1$ ) will tend to increase the value of the IRR by infection status because individuals immune to HPV type 1 contribute a lower rate of infection to the unexposed “uninfected” category.

$$IRR = \frac{\text{HPV type 2 infection incidence rate in HPV type 1 infected individuals}}{\text{HPV type 2 infection incidence rate in HPV type 1 uninfected individuals}}$$

### Overall population

Studies of interaction most often do not measure sexual partnership characteristics, and measure the IRR in all recruited individuals regardless of partnership status. However, partnership durations and dissolutions create prospective correlation between the times-at-risk for HPV type 1 and type 2 infections. This correlation arises from the inclusion of person-time from individuals who are not at-risk of infection with HPV type 2 because they are either single or in a sexual partnership with an uninfected individual. This can be seen in the equations below, where singles and individuals partnered with uninfected individuals contribute person-time to denominators without contributing to the incidence of numerators. The IRR by infection status in the overall population will thus be a biased estimate of the interaction effect  $\chi_{2g}$  of current infection.

$$IRR = \frac{\sum_{g,s,s'} \left( \lambda_{2g} \chi_{2g} \left( [I_1S_2]_{gs}^{[S_1I_2]_{g's'}} + [I_1S_2]_{gs}^{[I_1I_2]_{g's'}} + [I_1S_2]_{gs}^{[R_1I_2]_{g's'}} \right) \right) / \sum_{g,s} \left( [I_1S_2]_{gs}^0 + \sum_{s'} [I_1S_2]_{gs}^{N_{g's'}} \right)}{\sum_{g,s,s'} \left( \lambda_{2g} \left( [S_1S_2]_{gs}^{[S_1I_2]_{g's'}} + [S_1S_2]_{gs}^{[I_1I_2]_{g's'}} + [S_1S_2]_{gs}^{[R_1I_2]_{g's'}} \right) + \lambda_{2g} \varphi_{2g} \left( [R_1S_2]_{gs}^{[S_1I_2]_{g's'}} + [R_1S_2]_{gs}^{[I_1I_2]_{g's'}} + [R_1S_2]_{gs}^{[R_1I_2]_{g's'}} \right) \right) / \sum_{g,s} \left( [S_1S_2]_{gs}^0 + [R_1S_2]_{gs}^0 + \sum_{s'} \left( [S_1S_2]_{gs}^{N_{g's'}} + [R_1S_2]_{gs}^{N_{g's'}} \right) \right)}$$

$$IRR_{adj(s)} = \frac{\sum_s \left( \frac{\sum_{g,s'} \left( \lambda_{2g} \chi_{2g} \left( [I_1S_2]_{gs}^{[S_1I_2]_{g's'}} + [I_1S_2]_{gs}^{[I_1I_2]_{g's'}} + [I_1S_2]_{gs}^{[R_1I_2]_{g's'}} \right) \right) \times \sum_g \left( [S_1S_2]_{gs}^0 + [R_1S_2]_{gs}^0 + \sum_{s'} \left( [S_1S_2]_{gs}^{N_{g's'}} + [R_1S_2]_{gs}^{N_{g's'}} \right) \right)}{\sum_g \left( [S_1S_2]_{gs}^0 + [I_1S_2]_{gs}^0 + [R_1S_2]_{gs}^0 + \sum_{s'} \left( [S_1S_2]_{gs}^{N_{g's'}} + [I_1S_2]_{gs}^{N_{g's'}} + [R_1S_2]_{gs}^{N_{g's'}} \right) \right)} \right)}{\sum_s \left( \frac{\left( \sum_{g,s'} \left( \lambda_{2g} \left( [S_1S_2]_{gs}^{[S_1I_2]_{g's'}} + [S_1S_2]_{gs}^{[I_1I_2]_{g's'}} + [S_1S_2]_{gs}^{[R_1I_2]_{g's'}} \right) \right) + \lambda_{2g} \varphi_{2g} \left( [R_1S_2]_{gs}^{[S_1I_2]_{g's'}} + [R_1S_2]_{gs}^{[I_1I_2]_{g's'}} + [R_1S_2]_{gs}^{[R_1I_2]_{g's'}} \right) \right) \times \sum_g \left( [I_1S_2]_{gs}^0 + \sum_{s'} [I_1S_2]_{gs}^{N_{g's'}} \right)}{\sum_g \left( [S_1S_2]_{gs}^0 + [I_1S_2]_{gs}^0 + [R_1S_2]_{gs}^0 + \sum_{s'} \left( [S_1S_2]_{gs}^{N_{g's'}} + [I_1S_2]_{gs}^{N_{g's'}} + [R_1S_2]_{gs}^{N_{g's'}} \right) \right)} \right)}$$



### Restricting to partnered individuals

The issue of correlation between times-at-risk for infections may be partly remedied by restricting analyses to individuals in sexual partnerships, which will remove the person-time not at-risk contributed by single individuals. However, many individuals will still contribute person-time not at-risk by being in sexual partnerships in which they are not at risk of acquiring the outcome HPV.

$$IRR = \frac{\sum_{g,s,s'} (\lambda_{2g} \chi_{2g} ([I_1 S_2]_{gs}^{[S_1 I_2]_{g's'}} + [I_1 S_2]_{gs}^{[I_1 I_2]_{g's'}} + [I_1 S_2]_{gs}^{[R_1 I_2]_{g's'}}))}{\sum_{g,s,s'} (\lambda_{2g} ([S_1 S_2]_{gs}^{[S_1 I_2]_{g's'}} + [S_1 S_2]_{gs}^{[I_1 I_2]_{g's'}} + [S_1 S_2]_{gs}^{[R_1 I_2]_{g's'}}) + \lambda_{2g} \varphi_{2g} ([R_1 S_2]_{gs}^{[S_1 I_2]_{g's'}} + [R_1 S_2]_{gs}^{[I_1 I_2]_{g's'}} + [R_1 S_2]_{gs}^{[R_1 I_2]_{g's'}}))}$$

$$IRR_{adj(s)} = \frac{\sum_s \left( \frac{\sum_{g,s'} (\lambda_{2g} \chi_{2g} ([I_1 S_2]_{gs}^{[S_1 I_2]_{g's'}} + [I_1 S_2]_{gs}^{[I_1 I_2]_{g's'}} + [I_1 S_2]_{gs}^{[R_1 I_2]_{g's'}})) \times \sum_{g,s'} ([S_1 S_2]_{gs}^{N_{g's'}} + [R_1 S_2]_{gs}^{N_{g's'}})}{\sum_{g,s'} ([S_1 S_2]_{gs}^{N_{g's'}} + [I_1 S_2]_{gs}^{N_{g's'}} + [R_1 S_2]_{gs}^{N_{g's'}})} \right)}{\sum_s \left( \frac{\sum_{g,s'} (\lambda_{2g} ([S_1 S_2]_{gs}^{[S_1 I_2]_{g's'}} + [S_1 S_2]_{gs}^{[I_1 I_2]_{g's'}} + [S_1 S_2]_{gs}^{[R_1 I_2]_{g's'}}) + \lambda_{2g} \varphi_{2g} ([R_1 S_2]_{gs}^{[S_1 I_2]_{g's'}} + [R_1 S_2]_{gs}^{[I_1 I_2]_{g's'}} + [R_1 S_2]_{gs}^{[R_1 I_2]_{g's'}})) \times \sum_{g,s'} ([I_1 S_2]_{gs}^{N_{g's'}})}{\sum_{g,s'} ([S_1 S_2]_{gs}^{N_{g's'}} + [I_1 S_2]_{gs}^{N_{g's'}} + [R_1 S_2]_{gs}^{N_{g's'}})} \right)}$$

### Restricting to at-risk partnered individuals

Ideally, analyses would be restricted to individuals who are at-risk of infection with the outcome HPV, that is, individuals susceptible to HPV type 2 in a sexual partnership with partners infected with HPV type 2 ( $[X_1 S_2]_{gs}^{[Y_1 I_2]_{g's'}}$ ). This avoids the inclusion of person-time not at-risk from individuals who are not susceptible to infection or who are not in a sexual partnership where they are at-risk of infection. The IRR by infection status will be a valid estimate of the interaction effect of current infection  $\chi_{2g}$  if analyses are restricted to at-risk individuals partnered with HPV type 2 infected partners, and if there is no cross-immune interaction ( $\varphi_{2g}=1$ ).

$$IRR = \frac{\sum_{g,s,s'} (\lambda_{2g} \chi_{2g} ([I_1 S_2]_{gs}^{[S_1 I_2]_{g's'}} + [I_1 S_2]_{gs}^{[I_1 I_2]_{g's'}} + [I_1 S_2]_{gs}^{[R_1 I_2]_{g's'}}))}{\sum_{g,s,s'} (\lambda_{2g} ([S_1 S_2]_{gs}^{[S_1 I_2]_{g's'}} + [S_1 S_2]_{gs}^{[I_1 I_2]_{g's'}} + [S_1 S_2]_{gs}^{[R_1 I_2]_{g's'}}) + \lambda_{2g} \varphi_{2g} ([R_1 S_2]_{gs}^{[S_1 I_2]_{g's'}} + [R_1 S_2]_{gs}^{[I_1 I_2]_{g's'}} + [R_1 S_2]_{gs}^{[R_1 I_2]_{g's'}}))}$$

$$IRR = \frac{\sum_{g,s,s'} (\lambda_{2g} \chi_{2g} ([I_1 S_2]_{gs}^{[S_1 I_2]_{g's'}} + [I_1 S_2]_{gs}^{[I_1 I_2]_{g's'}} + [I_1 S_2]_{gs}^{[R_1 I_2]_{g's'}}))}{\sum_{g,s,s'} ([S_1 S_2]_{gs}^{[S_1 I_2]_{g's'}} + [S_1 S_2]_{gs}^{[I_1 I_2]_{g's'}} + [S_1 S_2]_{gs}^{[R_1 I_2]_{g's'}} + [R_1 S_2]_{gs}^{[S_1 I_2]_{g's'}} + [R_1 S_2]_{gs}^{[I_1 I_2]_{g's'}} + [R_1 S_2]_{gs}^{[R_1 I_2]_{g's'}})}$$



$$\begin{aligned}
IRR &= \frac{\sum_{g,s,s'} \left( \lambda_{2g} \varphi_{2g} \left( [R_1 S_2]_{gs}^{[S_1 I_2]_{g's'}} + [R_1 S_2]_{gs}^{[I_1 I_2]_{g's'}} + [R_1 S_2]_{gs}^{[R_1 I_2]_{g's'}} \right) \right) / \sum_{g,s,s'} \left( [R_1 S_2]_{gs}^0 + [R_1 S_2]_{gs}^{N_{g's'}} \right)}{\sum_{g,s,s'} \left( \lambda_{2g} \left( [S_1 S_2]_{gs}^{[S_1 I_2]_{g's'}} + [S_1 S_2]_{gs}^{[I_1 I_2]_{g's'}} + [S_1 S_2]_{gs}^{[R_1 I_2]_{g's'}} \right) + \lambda_{2g} \chi_{2g} \left( [I_1 S_2]_{gs}^{[S_1 I_2]_{g's'}} + [I_1 S_2]_{gs}^{[I_1 I_2]_{g's'}} + [I_1 S_2]_{gs}^{[R_1 I_2]_{g's'}} \right) \right) / \sum_{g,s,s'} \left( [S_1 S_2]_{gs}^0 + [I_1 S_2]_{gs}^0 + [S_1 S_2]_{gs}^{N_{g's'}} + [I_1 S_2]_{gs}^{N_{g's'}} \right)} \\
IRR_{adj(s)} &= \frac{\sum_s \left( \frac{\sum_{g,s,s'} \left( \lambda_{2g} \varphi_{2g} \left( [R_1 S_2]_{gs}^{[S_1 I_2]_{g's'}} + [R_1 S_2]_{gs}^{[I_1 I_2]_{g's'}} + [R_1 S_2]_{gs}^{[R_1 I_2]_{g's'}} \right) \right) \times \sum_{g,s,s'} \left( [S_1 S_2]_{gs}^0 + [I_1 S_2]_{gs}^0 + [S_1 S_2]_{gs}^{N_{g's'}} + [I_1 S_2]_{gs}^{N_{g's'}} \right)}{\sum_{g,s,s'} \left( [S_1 S_2]_{gs}^0 + [I_1 S_2]_{gs}^0 + [R_1 S_2]_{gs}^0 + [S_1 S_2]_{gs}^{N_{g's'}} + [I_1 S_2]_{gs}^{N_{g's'}} + [R_1 S_2]_{gs}^{N_{g's'}} \right)} \right)}{\sum_s \left( \frac{\sum_{g,s,s'} \left( \lambda_{2g} \left( [S_1 S_2]_{gs}^{[S_1 I_2]_{g's'}} + [S_1 S_2]_{gs}^{[I_1 I_2]_{g's'}} + [S_1 S_2]_{gs}^{[R_1 I_2]_{g's'}} \right) + \lambda_{2g} \chi_{2g} \left( [I_1 S_2]_{gs}^{[S_1 I_2]_{g's'}} + [I_1 S_2]_{gs}^{[I_1 I_2]_{g's'}} + [I_1 S_2]_{gs}^{[R_1 I_2]_{g's'}} \right) \right) \times \sum_{g,s,s'} \left( [R_1 S_2]_{gs}^0 + [R_1 S_2]_{gs}^{N_{g's'}} \right)}{\sum_{g,s,s'} \left( [S_1 S_2]_{gs}^0 + [I_1 S_2]_{gs}^0 + [R_1 S_2]_{gs}^0 + [S_1 S_2]_{gs}^{N_{g's'}} + [I_1 S_2]_{gs}^{N_{g's'}} + [R_1 S_2]_{gs}^{N_{g's'}} \right)} \right)}
\end{aligned}$$

### Restricting to partnered individuals

$$\begin{aligned}
IRR &= \frac{\sum_{g,s,s'} \left( \lambda_{2g} \varphi_{2g} \left( [R_1 S_2]_{gs}^{[S_1 I_2]_{g's'}} + [R_1 S_2]_{gs}^{[I_1 I_2]_{g's'}} + [R_1 S_2]_{gs}^{[R_1 I_2]_{g's'}} \right) \right) / \sum_{g,s,s'} \left( [R_1 S_2]_{gs}^{N_{g's'}} \right)}{\sum_{g,s,s'} \left( \lambda_{2g} \left( [S_1 S_2]_{gs}^{[S_1 I_2]_{g's'}} + [S_1 S_2]_{gs}^{[I_1 I_2]_{g's'}} + [S_1 S_2]_{gs}^{[R_1 I_2]_{g's'}} \right) + \lambda_{2g} \chi_{2g} \left( [I_1 S_2]_{gs}^{[S_1 I_2]_{g's'}} + [I_1 S_2]_{gs}^{[I_1 I_2]_{g's'}} + [I_1 S_2]_{gs}^{[R_1 I_2]_{g's'}} \right) \right) / \sum_{g,s,s'} \left( [S_1 S_2]_{gs}^{N_{g's'}} + [I_1 S_2]_{gs}^{N_{g's'}} \right)} \\
IRR_{adj(s)} &= \frac{\sum_s \left( \frac{\sum_{g,s,s'} \left( \lambda_{2g} \varphi_{2g} \left( [R_1 S_2]_{gs}^{[S_1 I_2]_{g's'}} + [R_1 S_2]_{gs}^{[I_1 I_2]_{g's'}} + [R_1 S_2]_{gs}^{[R_1 I_2]_{g's'}} \right) \right) \times \sum_{g,s,s'} \left( [S_1 S_2]_{gs}^{N_{g's'}} + [I_1 S_2]_{gs}^{N_{g's'}} \right)}{\sum_{g,s,s'} \left( [S_1 S_2]_{gs}^{N_{g's'}} + [I_1 S_2]_{gs}^{N_{g's'}} + [R_1 S_2]_{gs}^{N_{g's'}} \right)} \right)}{\sum_s \left( \frac{\sum_{g,s,s'} \left( \lambda_{2g} \left( [S_1 S_2]_{gs}^{[S_1 I_2]_{g's'}} + [S_1 S_2]_{gs}^{[I_1 I_2]_{g's'}} + [S_1 S_2]_{gs}^{[R_1 I_2]_{g's'}} \right) + \lambda_{2g} \chi_{2g} \left( [I_1 S_2]_{gs}^{[S_1 I_2]_{g's'}} + [I_1 S_2]_{gs}^{[I_1 I_2]_{g's'}} + [I_1 S_2]_{gs}^{[R_1 I_2]_{g's'}} \right) \right) \times \sum_{g,s,s'} \left( [R_1 S_2]_{gs}^{N_{g's'}} \right)}{\sum_{g,s,s'} \left( [S_1 S_2]_{gs}^{N_{g's'}} + [I_1 S_2]_{gs}^{N_{g's'}} + [R_1 S_2]_{gs}^{N_{g's'}} \right)} \right)}
\end{aligned}$$

### Restricting to at-risk individuals

The IRR by immune status will be a valid estimate of the interaction effect of immunity  $\varphi_{2g}$  if analyses are restricted to at-risk individuals partnered with HPV type 2 infected partners, and if there is no effect of current infection ( $\chi_{2g} = 1$ ).

$$\begin{aligned}
IRR &= \frac{\sum_{g,s,s'} \left( \lambda_{2g} \varphi_{2g} \left( [R_1 S_2]_{gs}^{[S_1 I_2]_{g's'}} + [R_1 S_2]_{gs}^{[I_1 I_2]_{g's'}} + [R_1 S_2]_{gs}^{[R_1 I_2]_{g's'}} \right) \right) / \sum_{g,s,s'} \left( [R_1 S_2]_{gs}^{[S_1 I_2]_{g's'}} + [R_1 S_2]_{gs}^{[I_1 I_2]_{g's'}} + [R_1 S_2]_{gs}^{[R_1 I_2]_{g's'}} \right)}{\sum_{g,s,s'} \left( \lambda_{2g} \left( [S_1 S_2]_{gs}^{[S_1 I_2]_{g's'}} + [S_1 S_2]_{gs}^{[I_1 I_2]_{g's'}} + [S_1 S_2]_{gs}^{[R_1 I_2]_{g's'}} \right) + \lambda_{2g} \chi_{2g} \left( [I_1 S_2]_{gs}^{[S_1 I_2]_{g's'}} + [I_1 S_2]_{gs}^{[I_1 I_2]_{g's'}} + [I_1 S_2]_{gs}^{[R_1 I_2]_{g's'}} \right) \right) / \sum_{g,s,s'} \left( [S_1 S_2]_{gs}^{[S_1 I_2]_{g's'}} + [S_1 S_2]_{gs}^{[I_1 I_2]_{g's'}} + [S_1 S_2]_{gs}^{[R_1 I_2]_{g's'}} + [I_1 S_2]_{gs}^{[S_1 I_2]_{g's'}} + [I_1 S_2]_{gs}^{[I_1 I_2]_{g's'}} + [I_1 S_2]_{gs}^{[R_1 I_2]_{g's'}} \right)}
\end{aligned}$$

$$\begin{aligned}
& \sum_s \left( \lambda_{2g} \varphi_{2g} \left( [R_1 S_2]_{gs}^{[S_1 I_2]_{g's'}} + [R_1 S_2]_{gs}^{[I_1 I_2]_{g's'}} + [R_1 S_2]_{gs}^{[R_1 I_2]_{g's'}} \right) \right) \times \sum_{g,s'} \left( [S_1 S_2]_{gs}^{[S_1 I_2]_{g's'}} + [S_1 S_2]_{gs}^{[I_1 I_2]_{g's'}} + [S_1 S_2]_{gs}^{[R_1 I_2]_{g's'}} \right) \\
& \sum_s \left( [I_1 S_2]_{gs}^{[S_1 I_2]_{g's'}} + [I_1 S_2]_{gs}^{[I_1 I_2]_{g's'}} + [I_1 S_2]_{gs}^{[R_1 I_2]_{g's'}} \right) \\
& \sum_{g,s'} \left( [S_1 S_2]_{gs}^{[S_1 I_2]_{g's'}} + [S_1 S_2]_{gs}^{[I_1 I_2]_{g's'}} + [S_1 S_2]_{gs}^{[R_1 I_2]_{g's'}} \right) \\
& \sum_{g,s'} \left( [I_1 S_2]_{gs}^{[S_1 I_2]_{g's'}} + [I_1 S_2]_{gs}^{[I_1 I_2]_{g's'}} + [I_1 S_2]_{gs}^{[R_1 I_2]_{g's'}} \right) \\
& \sum_{g,s'} \left( [R_1 S_2]_{gs}^{[S_1 I_2]_{g's'}} + [R_1 S_2]_{gs}^{[I_1 I_2]_{g's'}} + [R_1 S_2]_{gs}^{[R_1 I_2]_{g's'}} \right) \\
\end{aligned}$$

$$\begin{aligned}
& \sum_{g,s'} \left( \lambda_{2g} \left( [S_1 S_2]_{gs}^{[S_1 I_2]_{g's'}} + [S_1 S_2]_{gs}^{[I_1 I_2]_{g's'}} + [S_1 S_2]_{gs}^{[R_1 I_2]_{g's'}} \right) \right) \\
& \sum_{g,s'} \left( \lambda_{2g} \chi_{2g} \left( [I_1 S_2]_{gs}^{[S_1 I_2]_{g's'}} + [I_1 S_2]_{gs}^{[I_1 I_2]_{g's'}} + [I_1 S_2]_{gs}^{[R_1 I_2]_{g's'}} \right) \right) \times \sum_{g,s'} \left( [R_1 S_2]_{gs}^{[S_1 I_2]_{g's'}} + [R_1 S_2]_{gs}^{[I_1 I_2]_{g's'}} + [R_1 S_2]_{gs}^{[R_1 I_2]_{g's'}} \right) \\
& \sum_s \left( [S_1 S_2]_{gs}^{[S_1 I_2]_{g's'}} + [S_1 S_2]_{gs}^{[I_1 I_2]_{g's'}} + [S_1 S_2]_{gs}^{[R_1 I_2]_{g's'}} \right) \\
& \sum_{g,s'} \left( [I_1 S_2]_{gs}^{[S_1 I_2]_{g's'}} + [I_1 S_2]_{gs}^{[I_1 I_2]_{g's'}} + [I_1 S_2]_{gs}^{[R_1 I_2]_{g's'}} \right) \\
& \sum_{g,s'} \left( [R_1 S_2]_{gs}^{[S_1 I_2]_{g's'}} + [R_1 S_2]_{gs}^{[I_1 I_2]_{g's'}} + [R_1 S_2]_{gs}^{[R_1 I_2]_{g's'}} \right) \\
\end{aligned}$$

$$IRR_{adj(s)} = \frac{\sum_s \left( \lambda_{2g} \varphi_{2g} \left( [R_1 S_2]_{gs}^{[S_1 I_2]_{g's'}} + [R_1 S_2]_{gs}^{[I_1 I_2]_{g's'}} + [R_1 S_2]_{gs}^{[R_1 I_2]_{g's'}} \right) \right) \times \sum_{g,s'} \left( [S_1 S_2]_{gs}^{[S_1 I_2]_{g's'}} + [S_1 S_2]_{gs}^{[I_1 I_2]_{g's'}} + [S_1 S_2]_{gs}^{[R_1 I_2]_{g's'}} \right)}{\sum_s \left( [S_1 S_2]_{gs}^{[S_1 I_2]_{g's'}} + [S_1 S_2]_{gs}^{[I_1 I_2]_{g's'}} + [S_1 S_2]_{gs}^{[R_1 I_2]_{g's'}} \right) + \sum_{g,s'} \left( [I_1 S_2]_{gs}^{[S_1 I_2]_{g's'}} + [I_1 S_2]_{gs}^{[I_1 I_2]_{g's'}} + [I_1 S_2]_{gs}^{[R_1 I_2]_{g's'}} \right) + \sum_{g,s'} \left( [R_1 S_2]_{gs}^{[S_1 I_2]_{g's'}} + [R_1 S_2]_{gs}^{[I_1 I_2]_{g's'}} + [R_1 S_2]_{gs}^{[R_1 I_2]_{g's'}} \right)}$$

## References

1. Soetaert K, Petzoldt T, Setzer RW. Solving differential equations in R: package deSolve. *Journal of Statistical Software* 2010;33.
2. Garnett GP, Anderson RM. Balancing sexual partnerships in an age and activity stratified model of HIV transmission in heterosexual populations. *IMA J Math Appl Med Biol* 1994;11(3):161-92.
3. Rothman KJ, Greenland S. *Modern epidemiology*. Philadelphia [etc.]: Wolters Kluwer/Lippincott Williams and Wilkins; 2008.
4. Chandra A, Mosher WD, Copen C, et al. Sexual behavior, sexual attraction, and sexual identity in the United States: data from the 2006-2008 National Survey of Family Growth. *Natl Health Stat Report* 2011(36):1-36.
5. Insinga RP, Perez G, Wheeler CM, et al. Incidence, duration, and reappearance of type-specific cervical human papillomavirus infections in young women. *Cancer Epidemiol Biomarkers Prev* 2010;19(6):1585-94.
6. Carter JJ, Koutsky LA, Hughes JP, et al. Comparison of human papillomavirus types 16, 18, and 6 capsid antibody responses following incident infection. *J Infect Dis* 2000;181(6):1911-9.
7. Wang SS, Schiffman M, Herrero R, et al. Determinants of human papillomavirus 16 serological conversion and persistence in a population-based cohort of 10 000 women in Costa Rica. *Br J Cancer* 2004;91(7):1269-74.
8. Demers AA, Shearer B, Severini A, et al. Distribution of human papillomavirus types, cervical cancer screening history, and risk factors for infection in Manitoba. *Chronic Dis Inj Can* 2012;32(4):177-85.
9. Bogaards JA, Xiridou M, Coupe VM, et al. Model-based estimation of viral transmissibility and infection-induced resistance from the age-dependent prevalence of infection for 14 high-risk types of human papillomavirus. *Am J Epidemiol* 2010;171(7):817-25.
10. Mercer CH, Tanton C, Prah P, et al. Changes in sexual attitudes and lifestyles in Britain through the life course and over time: findings from the National Surveys of Sexual Attitudes and Lifestyles (Natsal). *The Lancet* 2013;382(9907):1781-94.
11. Chaturvedi AK, Katki HA, Hildesheim A, et al. Human papillomavirus infection with multiple types: pattern of coinfection and risk of cervical disease. *J Infect Dis* 2011;203(7):910-20.
12. Dickson EL, Vogel RI, Bliss RL, et al. Multiple-type human papillomavirus (HPV) infections: a cross-sectional analysis of the prevalence of specific types in 309,000 women referred for HPV testing at the time of cervical cytology. *Int J Gynecol Cancer* 2013;23(7):1295-302.
13. Mejlhede N, Pedersen BV, Frisch M, et al. Multiple human papilloma virus types in cervical infections: competition or synergy? *APMIS* 2010;118(5):346-52.
14. Mendez F, Munoz N, Posso H, et al. Cervical coinfection with human papillomavirus (HPV) types and possible implications for the prevention of cervical cancer by HPV vaccines. *J Infect Dis* 2005;192(7):1158-65.
15. Rositch AF, Poole C, Hudgens MG, et al. Multiple human papillomavirus infections and type competition in men. *J Infect Dis* 2012;205(1):72-81.
16. Liaw KL, Hildesheim A, Burk RD, et al. A prospective study of human papillomavirus (HPV) type 16 DNA detection by polymerase chain reaction and its association with acquisition and persistence of other HPV types. *J Infect Dis* 2001;183(1):8-15.

17. Kjaer SK, Munk C, Winther JF, et al. Acquisition and persistence of human papillomavirus infection in younger men: a prospective follow-up study among Danish soldiers. *Cancer Epidemiol Biomarkers Prev* 2005;14(6):1528-33.
18. Moscicki AB, Ma Y, Jonte J, et al. The role of sexual behavior and human papillomavirus persistence in predicting repeated infections with new human papillomavirus types. *Cancer Epidemiol Biomarkers Prev* 2010;19(8):2055-65.
19. Plummer M, Schiffman M, Castle PE, et al. A 2-year prospective study of human papillomavirus persistence among women with a cytological diagnosis of atypical squamous cells of undetermined significance or low-grade squamous intraepithelial lesion. *J Infect Dis* 2007;195(11):1582-9.
20. Rositch AF, Hudgens MG, Backes DM, et al. Vaccine-relevant human papillomavirus (HPV) infections and future acquisition of high-risk HPV types in men. *J Infect Dis* 2012;206(5):669-77.
21. Rousseau MC, Pereira JS, Prado JC, et al. Cervical coinfection with human papillomavirus (HPV) types as a predictor of acquisition and persistence of HPV infection. *J Infect Dis* 2001;184(12):1508-17.
22. Ho GY, Studentsov Y, Hall CB, et al. Risk factors for subsequent cervicovaginal human papillomavirus (HPV) infection and the protective role of antibodies to HPV-16 virus-like particles. *J Infect Dis* 2002;186(6):737-42.
23. Malik ZA, Hailpern SM, Burk RD. Persistent antibodies to HPV virus-like particles following natural infection are protective against subsequent cervicovaginal infection with related and unrelated HPV. *Viral Immunol* 2009;22(6):445-9.

**Web Table 2.** Measures of association between HPV types 1 and 2 in the base case scenario with no modeled interactions

|                         | Single and Partnered Individuals |                                  |                           |                            | Partnered Individuals (Adjusted <sup>a</sup> ) | At-Risk Partnered Individuals (Adjusted <sup>a</sup> ) |
|-------------------------|----------------------------------|----------------------------------|---------------------------|----------------------------|------------------------------------------------|--------------------------------------------------------|
|                         | Overall (Crude)                  | Overall (Adjusted <sup>a</sup> ) | Low Sexual Activity Level | High Sexual Activity Level |                                                |                                                        |
| OR                      | 1.39                             | 1.31                             | 1.36                      | 1.12                       | 1.29                                           | 1.10                                                   |
| IRR by infection status | 1.37                             | 1.27                             | 1.32                      | 1.07                       | 1.22                                           | 1.00 <sup>b</sup>                                      |
| IRR by immune status    | 1.09                             | 1.00                             | 1.00                      | 1.00                       | 1.00                                           | 1.00 <sup>b</sup>                                      |

HPV = human papillomavirus; OR = prevalence odds ratio of HPV type 2 infection prevalence odds in HPV type 1 infected vs. uninfected individuals; IRR by infection status = incidence rate ratio of HPV type 2 infection in HPV type 1 infected vs. uninfected individuals; IRR by immune status = incidence rate ratio of HPV type 2 infection in HPV type 1 immune vs. non-immune individuals.

<sup>a</sup> Adjusted for sexual activity level using Mantel-Haenszel estimators.

<sup>b</sup> Equal to exactly 1 (no bias).

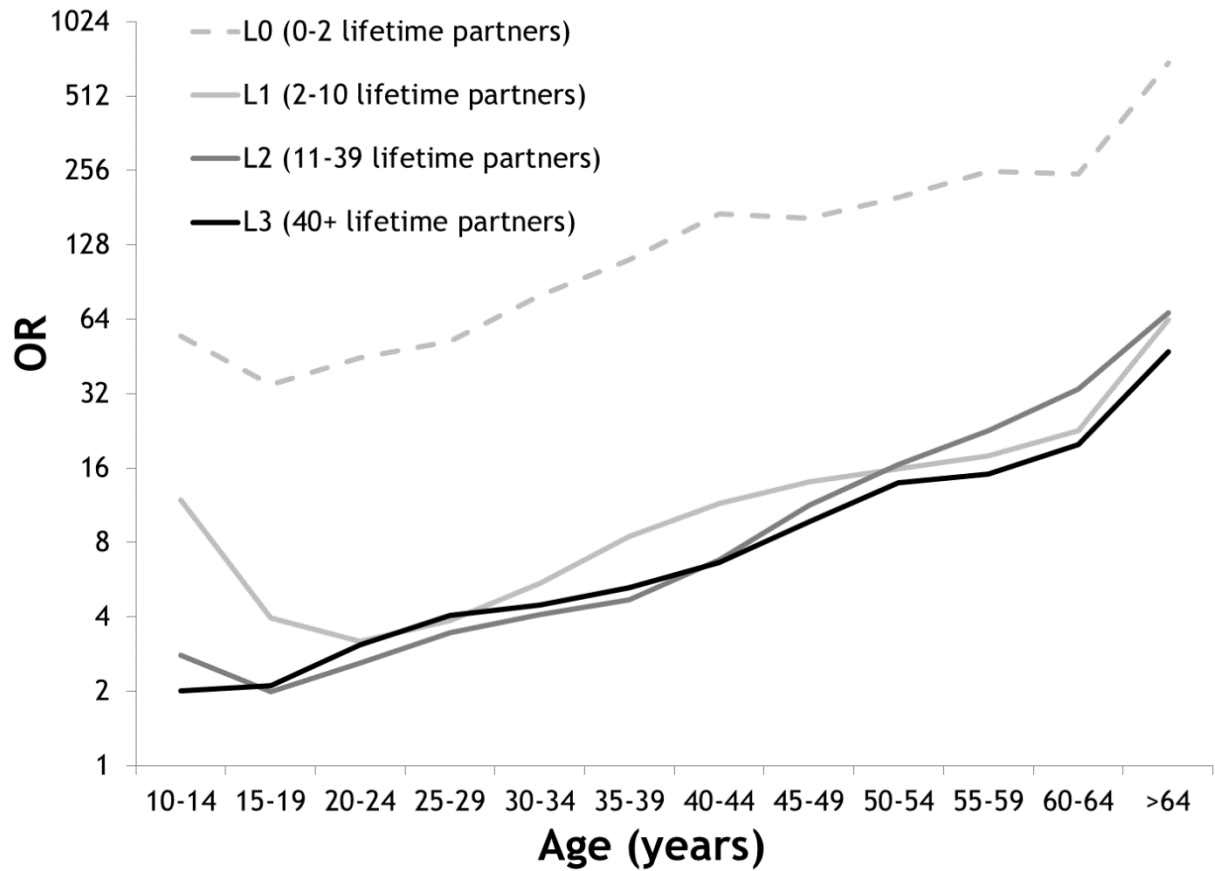

**Web Figure 3.** Prevalence odds ratio of HPV-33 infection in HPV-16 infected vs. uninfected sexually active women in HPV-ADVISE, by age and sexual activity level. HPV types have no interactions in HPV-ADVISE. Sexual activity levels L0, L1, L2, and L3 represent categories of women with increasing sexual risk behaviors, with earlier ages of sexual onset, a higher proportion of casual partnerships, higher partner acquisition rates, and shorter partnership durations. Women in sexual activity level L0, L1, L2, and L3 will have on average 0-2, 2-10, 11-39, and 40+ lifetime sexual partners respectively by the end of their life. Sexual behavior also varies over age, with lower partner acquisition rates and longer partnership durations as women age. The y-axis uses a base-2 log scale. OR = prevalence odds ratio.
